# Supplementary material for: MicroRNA miR-29 controls a compensatory response to limit neuronal iron accumulation during adult life and aging
Source: PubMed Central journal article supplement (PMC5304403; doi:10.1186/s12915-017-0354-x), 2017-02-13

# OXIDATIVE PHOSPHORYLATION

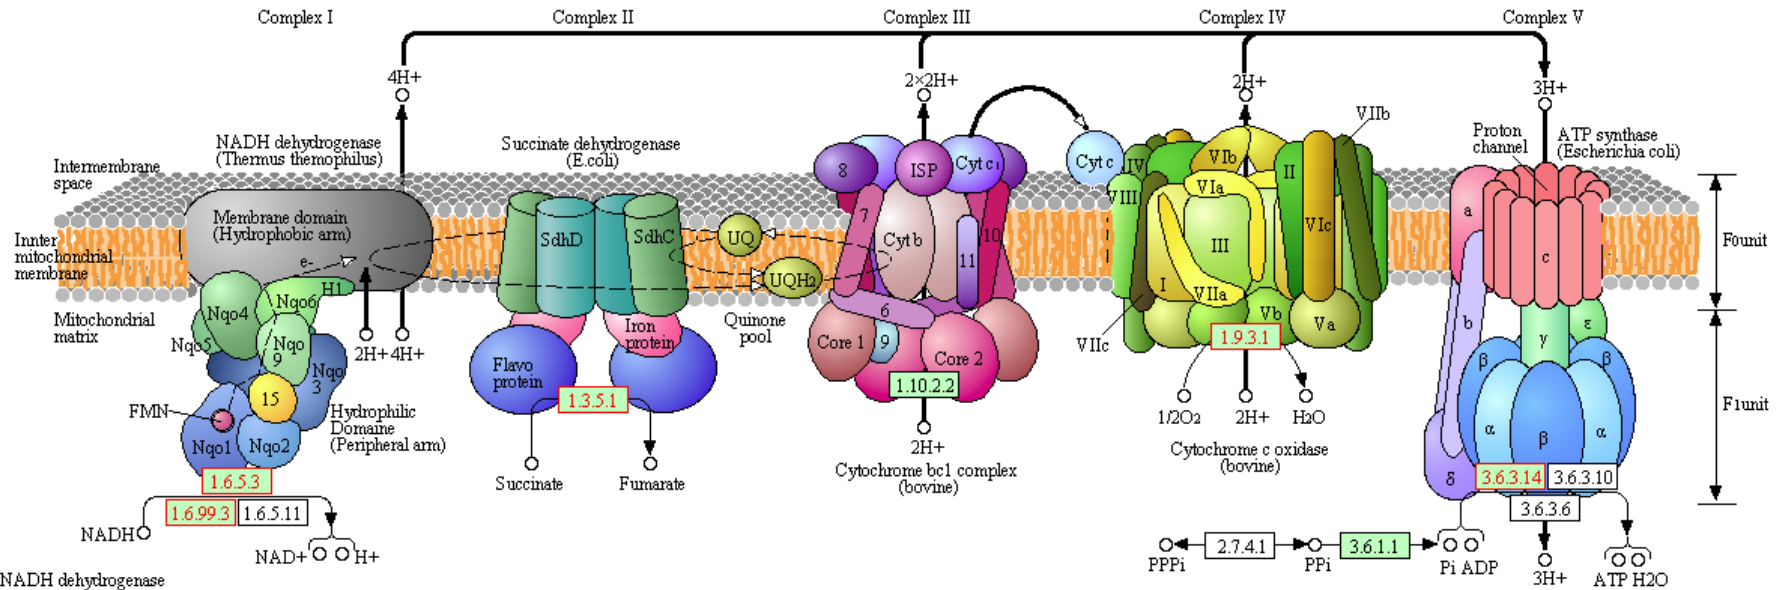

## NADH dehydrogenase

|     |        |        |        |        |        |        |        |        |        |         |         |         |         |      |      |      |      |
|-----|--------|--------|--------|--------|--------|--------|--------|--------|--------|---------|---------|---------|---------|------|------|------|------|
| E   | ND1    | ND2    | ND3    | ND4    | ND4L   | ND5    | ND6    |        |        |         |         |         |         |      |      |      |      |
| E   | Ndufs1 | Ndufs2 | Ndufs3 | Ndufs4 | Ndufs5 | Ndufs6 | Ndufs7 | Ndufs8 | Ndufs9 | Ndufs10 | Ndufs11 | Ndufs12 |         |      |      |      |      |
| B/A | NuoA   | NuoB   | NuoC   | NuoD   | NuoE   | NuoF   | NuoG   | NuoH   | NuoI   | NuoJ    | NuoK    | NuoL    | NuoM    | NuoN |      |      |      |
| B/A | NdhC   | NdhK   | NdhJ   | NdhH   | NdhA   | NdhI   | NdhG   | NdhE   | NdhF   | NdhD    | NdhB    | NdhL    | NdhM    | NdhN | HoxE | HoxF | HoxU |
| E   | Ndufa1 | Ndufa2 | Ndufa3 | Ndufa4 | Ndufa5 | Ndufa6 | Ndufa7 | Ndufa8 | Ndufa9 | Ndufa10 | Ndufa11 | Ndufa12 | Ndufa13 |      |      |      |      |
| E   | Ndubf1 | Ndubf2 | Ndubf3 | Ndubf4 | Ndubf5 | Ndubf6 | Ndubf7 | Ndubf8 | Ndubf9 | Ndubf10 | Ndubf11 | Ndubf12 | Ndubf13 |      |      |      |      |

## Succinate dehydrogenase / Fumarate reductase

|     |      |      |      |      |      |      |      |      |
|-----|------|------|------|------|------|------|------|------|
| E   | SDHC | SDHD | SDHA | SDHB |      |      |      |      |
| B/A | SdhC | SdhD | SdhA | SdhB | FrdA | FrdB | FrdC | FrdD |

## Cytochrome c oxidase

|     |       |      |      |      |      |       |       |       |       |       |       |       |       |      |       |       |       |       |       |       |
|-----|-------|------|------|------|------|-------|-------|-------|-------|-------|-------|-------|-------|------|-------|-------|-------|-------|-------|-------|
| E   | COX10 | COX3 | COX1 | COX2 | COX4 | COX5A | COX5B | COX6A | COX6B | COX6C | COX7A | COX7B | COX7C | COX8 | E/B/A | COX11 | COX15 | COX17 |       |       |
| B/A | CyoE  | CyoD | CyoC | CyoB | CyoA |       |       |       |       |       |       |       |       |      |       |       |       | COX11 | COX15 | COX17 |
|     |       | CoxD | CoxC | CoxA | CoxB |       |       |       |       |       |       |       |       |      |       |       |       |       |       |       |
|     |       | QoxD | QoxC | QoxB | QoxA |       |       |       |       |       |       |       |       |      |       |       |       |       |       |       |

## Cytochrome c reductase

|       |      |       |       |      |      |      |       |  |  |  |
|-------|------|-------|-------|------|------|------|-------|--|--|--|
| E/B/A | ISP  | Cyt b | Cyt 1 |      |      |      |       |  |  |  |
| E     | COR1 | QCR2  | QCR6  | QCR7 | QCR8 | QCR9 | QCR10 |  |  |  |

## Cytochrome c oxidase, cbb3-type

|   |   |    |    |     |
|---|---|----|----|-----|
| B | I | II | IV | III |
|---|---|----|----|-----|

## Cytochrome bd complex

|     |      |      |
|-----|------|------|
| B/A | CydA | CydB |
|-----|------|------|

## F-type ATPase (Bacteria)

|       |      |       |       |         |
|-------|------|-------|-------|---------|
| alpha | beta | gamma | delta | epsilon |
| a     | b    | c     |       |         |

## F-type ATPase (Eukaryotes)

|       |      |       |       |         |   |
|-------|------|-------|-------|---------|---|
| alpha | beta | gamma | delta | epsilon |   |
| OSCP  | a    | b     | c     | d       | e |
| f     | g    | f6/h  | j     | k       | 8 |

## V/A-type ATPase (Bacteria, Archaea)

|   |   |   |   |   |   |     |
|---|---|---|---|---|---|-----|
| A | B | C | D | E | F | G/H |
| I | K |   |   |   |   |     |

## V-type ATPase (Eukaryotes)

|   |   |   |   |    |   |   |   |
|---|---|---|---|----|---|---|---|
| A | B | C | D | E  | F | G | H |
| a | c | d | e | S1 |   |   |   |



# PROTEIN PROCESSING IN ENDOPLASMIC RETICULUM

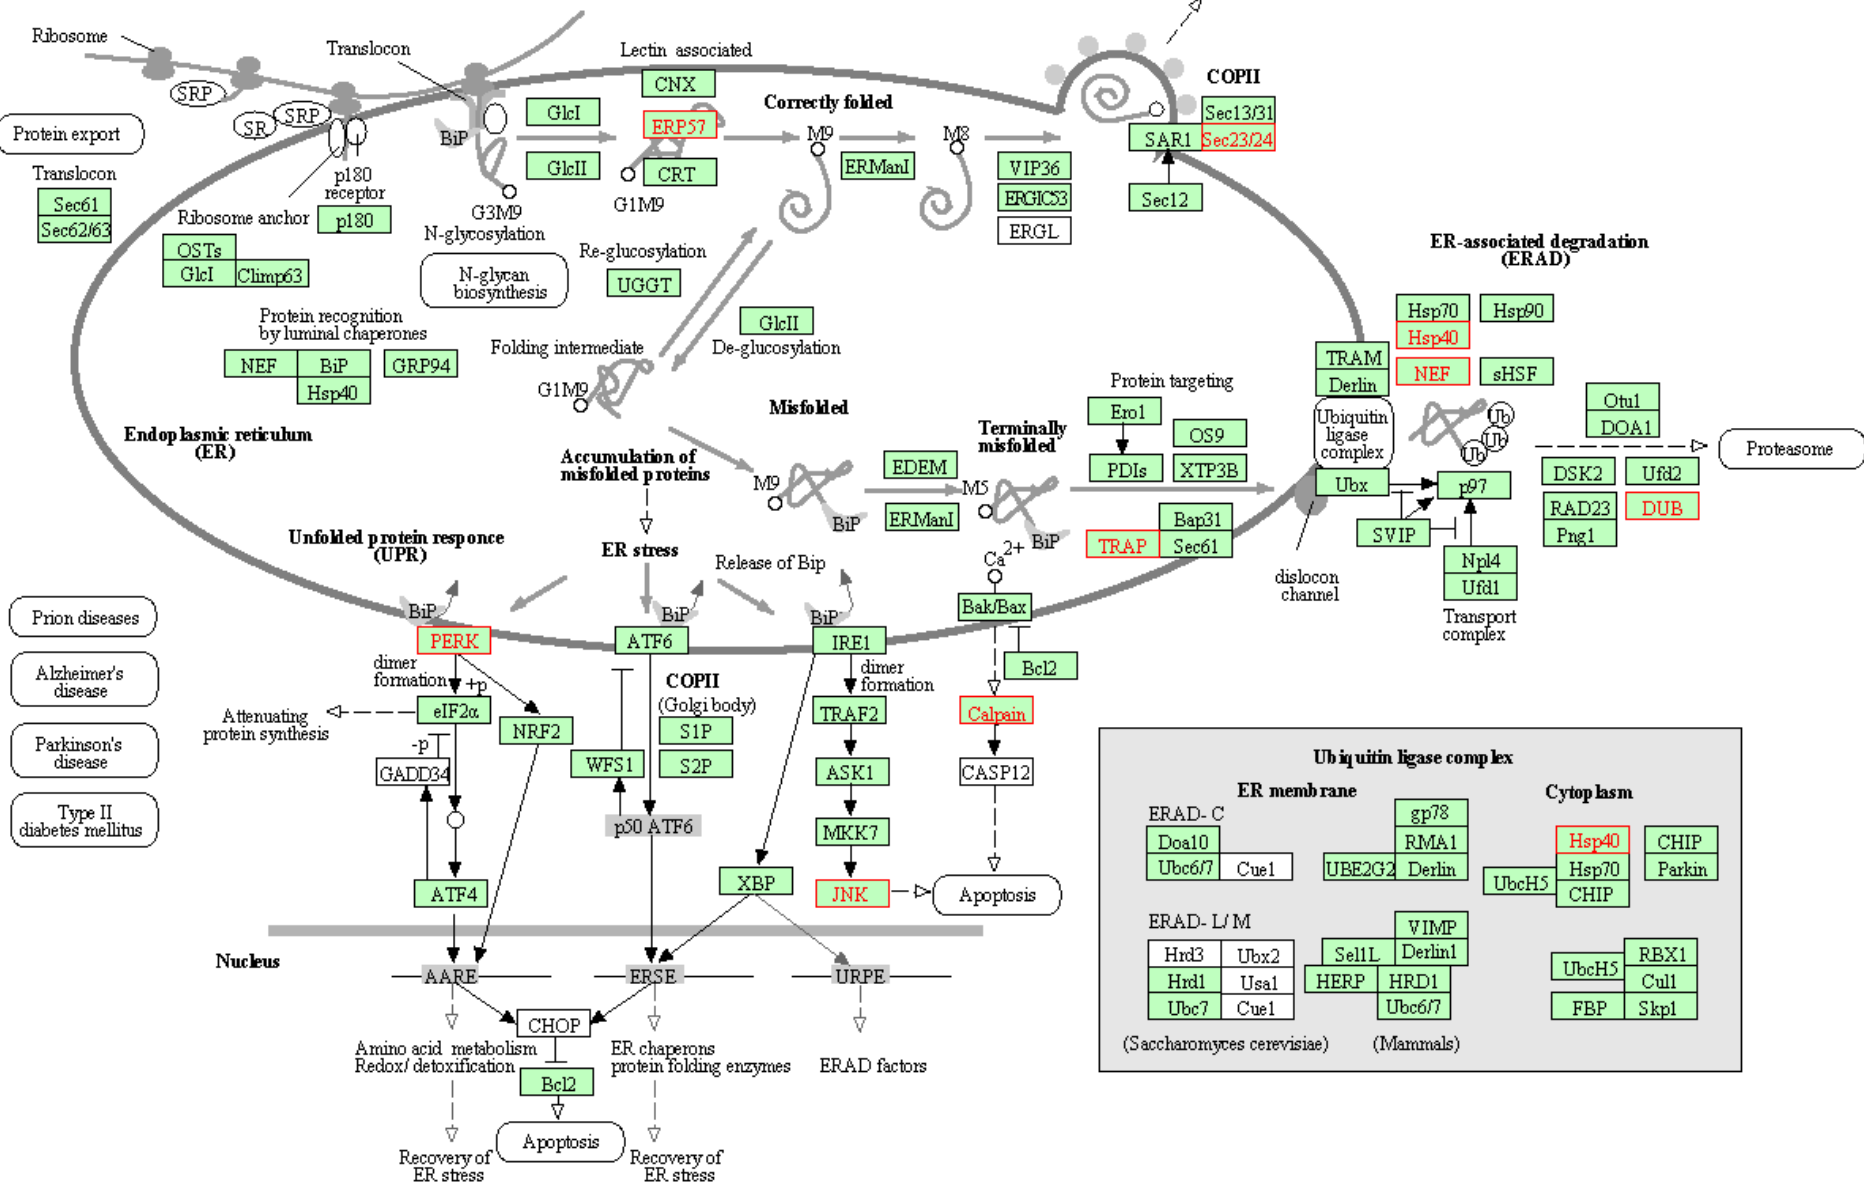

**LYSOSOME**

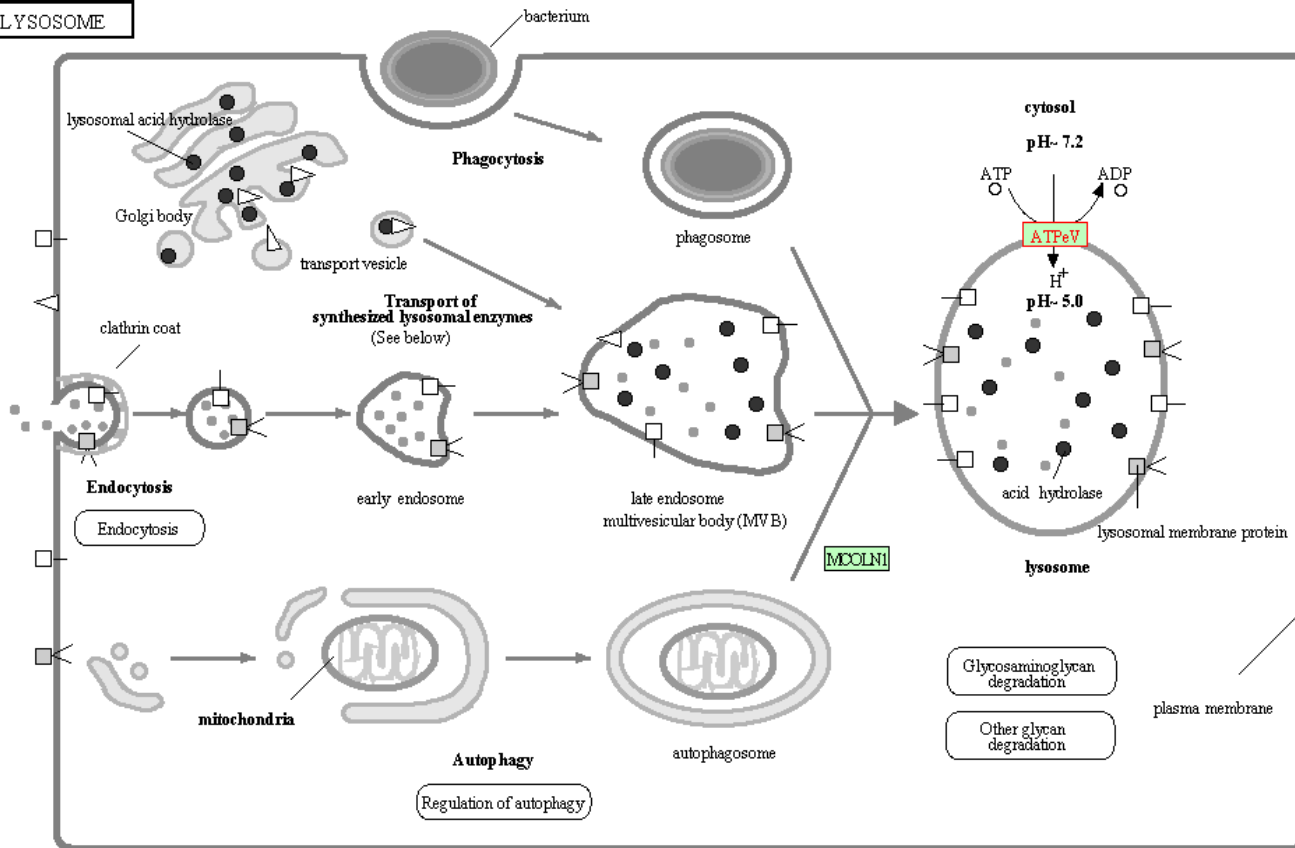

- Lysosomal acid hydrolases**
- proteases**
    - cathepsins
    - napsin
    - LGMN
    - TPP1
  - glycosidases**
    - GLA
    - GLB
    - GAA
    - GBA
    - IDUA
    - NAGA
    - NAGLU
    - GALC
    - GUSB
    - FUCA1
    - HEXA/B
    - MANB
    - LAMAN
    - NEU1
    - HYAL1
  - sulfatases**
    - ARS
    - GALNS
    - GNS
    - IDS
    - SGSH
  - lipases**
    - LIPA
    - LYPLA3
  - nuclease**
    - DNaseII
  - phosphatase**
    - ACP2
    - ACP5
  - sphingomyelinase**
    - SMPD1
  - ceramidase**
    - ASAH1
  - aspartylglucosaminidase**
    - AGA
  - Other lysosomal enzymes and activators**
    - saposin
    - GM2A
    - CLN1

- Lysosomal membrane proteins**
- major lysosomal membrane proteins**
    - LAMP
    - LIMP
  - minor lysosomal membrane proteins**
    - NPC
    - cystinosin
    - sialin
    - NRAMP
    - LAPTM
    - ABCA2
    - ABCB9
    - ACP2
    - endolym
    - LALP70
    - sortilin
    - CLN3
    - CLN5
    - CLN7
    - HGSNAT
    - MCOLN1
    - LITAF

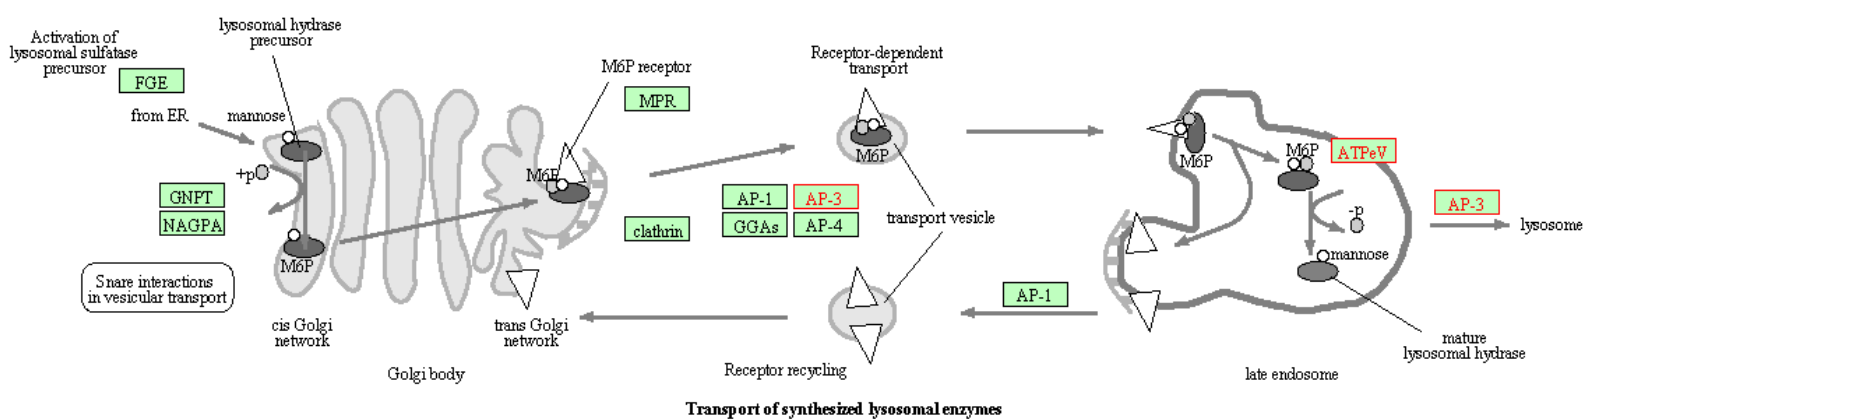

**Transport of synthesized lysosomal enzymes**

# CARDIAC MUSCLE CONTRACTION

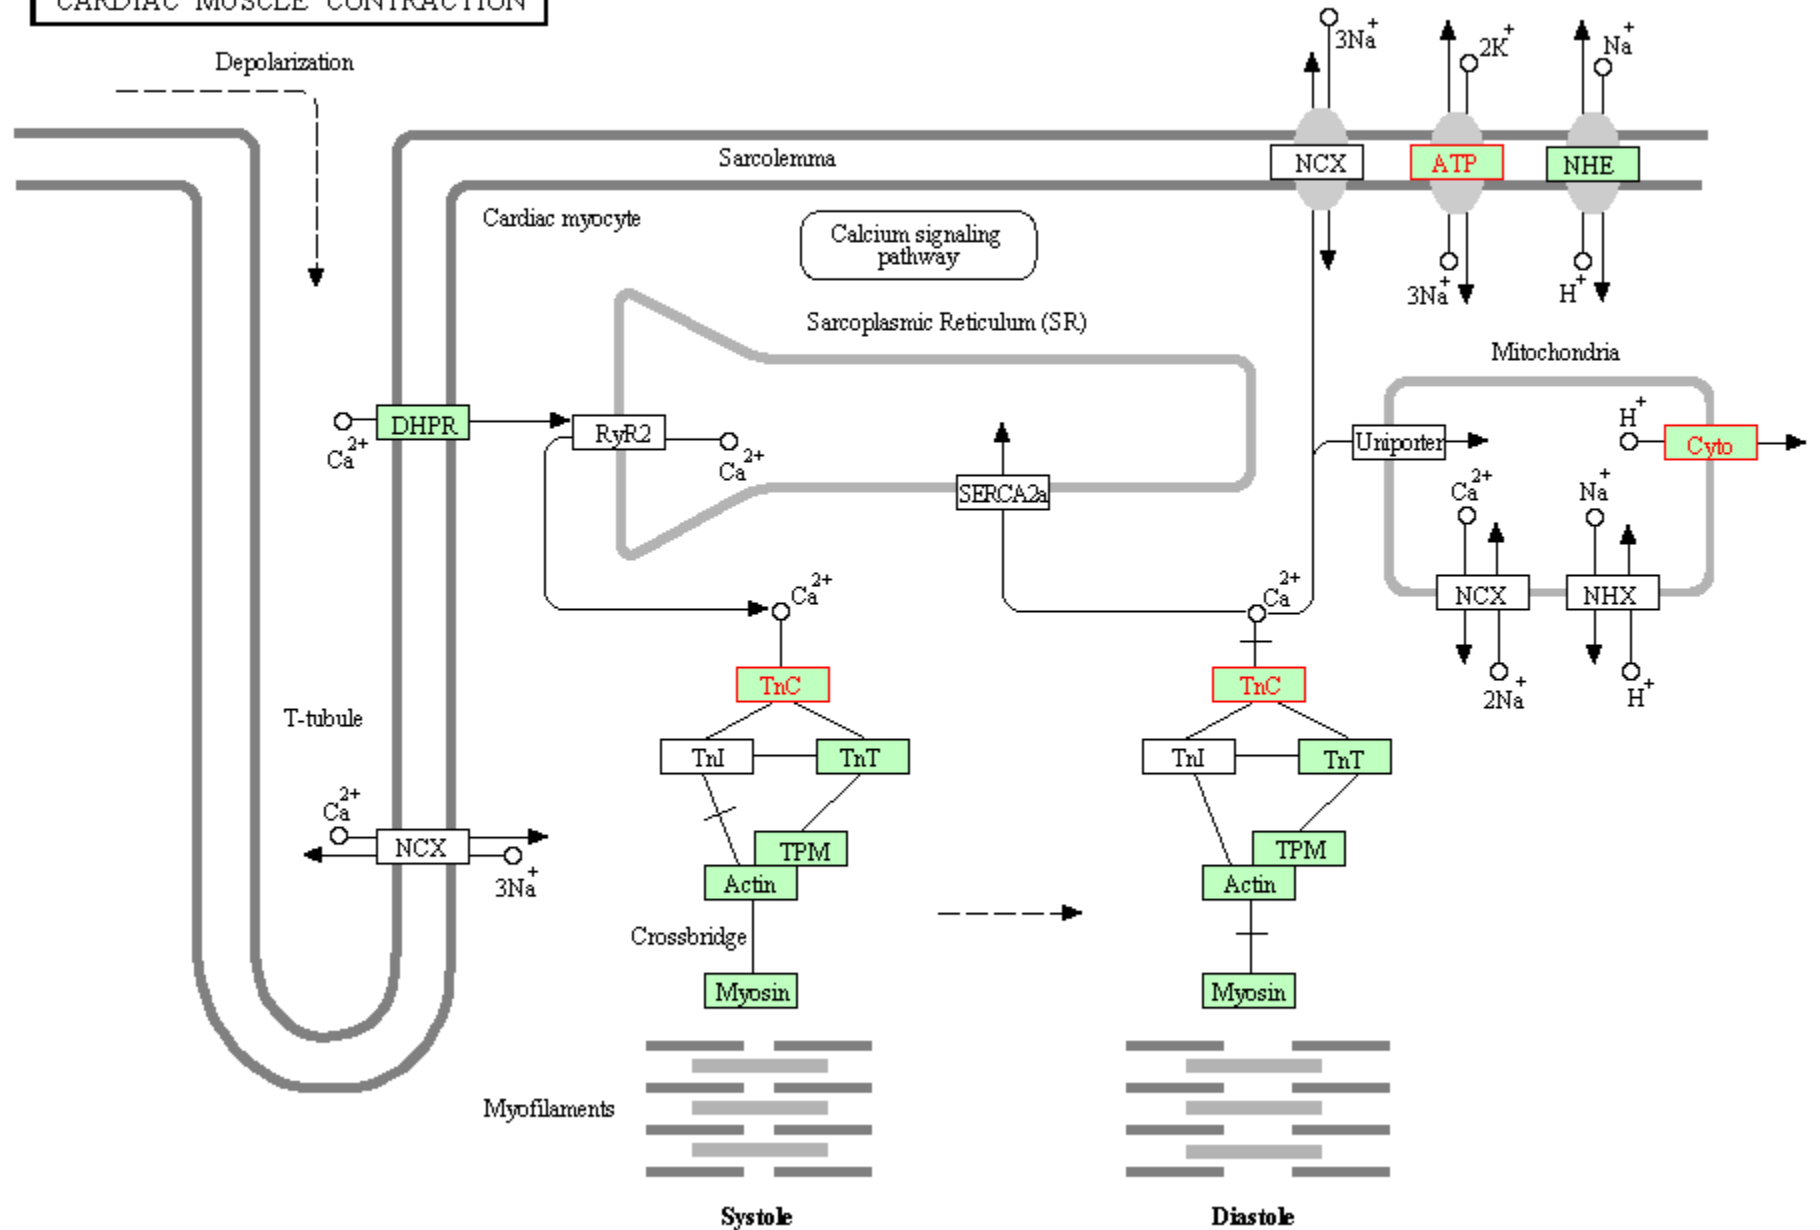

# RIBOSOME BIOGENESIS IN EUKARYOTES

**Ribosomal RNAs**

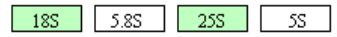

**90S pre-ribosome components**

UTP-C complex

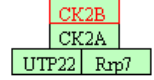

t-UTP complex

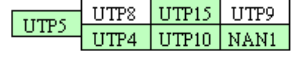

UTP-B complex

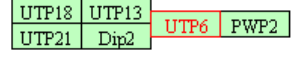

MPP10 complex

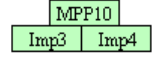

Pol I

Pol III

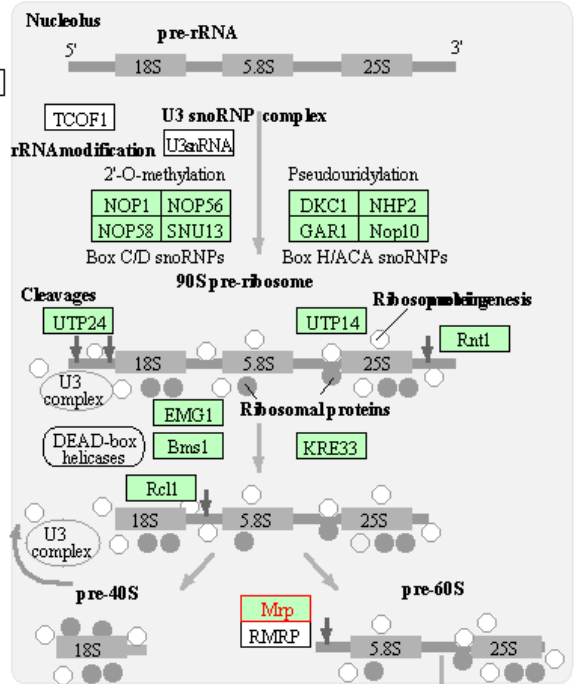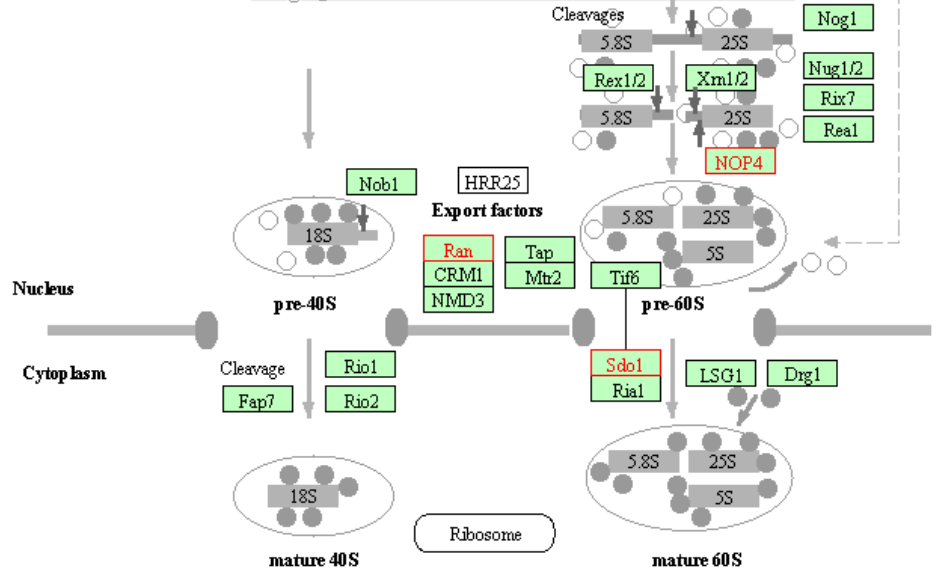

# CITRATE CYCLE (TCA CYCLE)

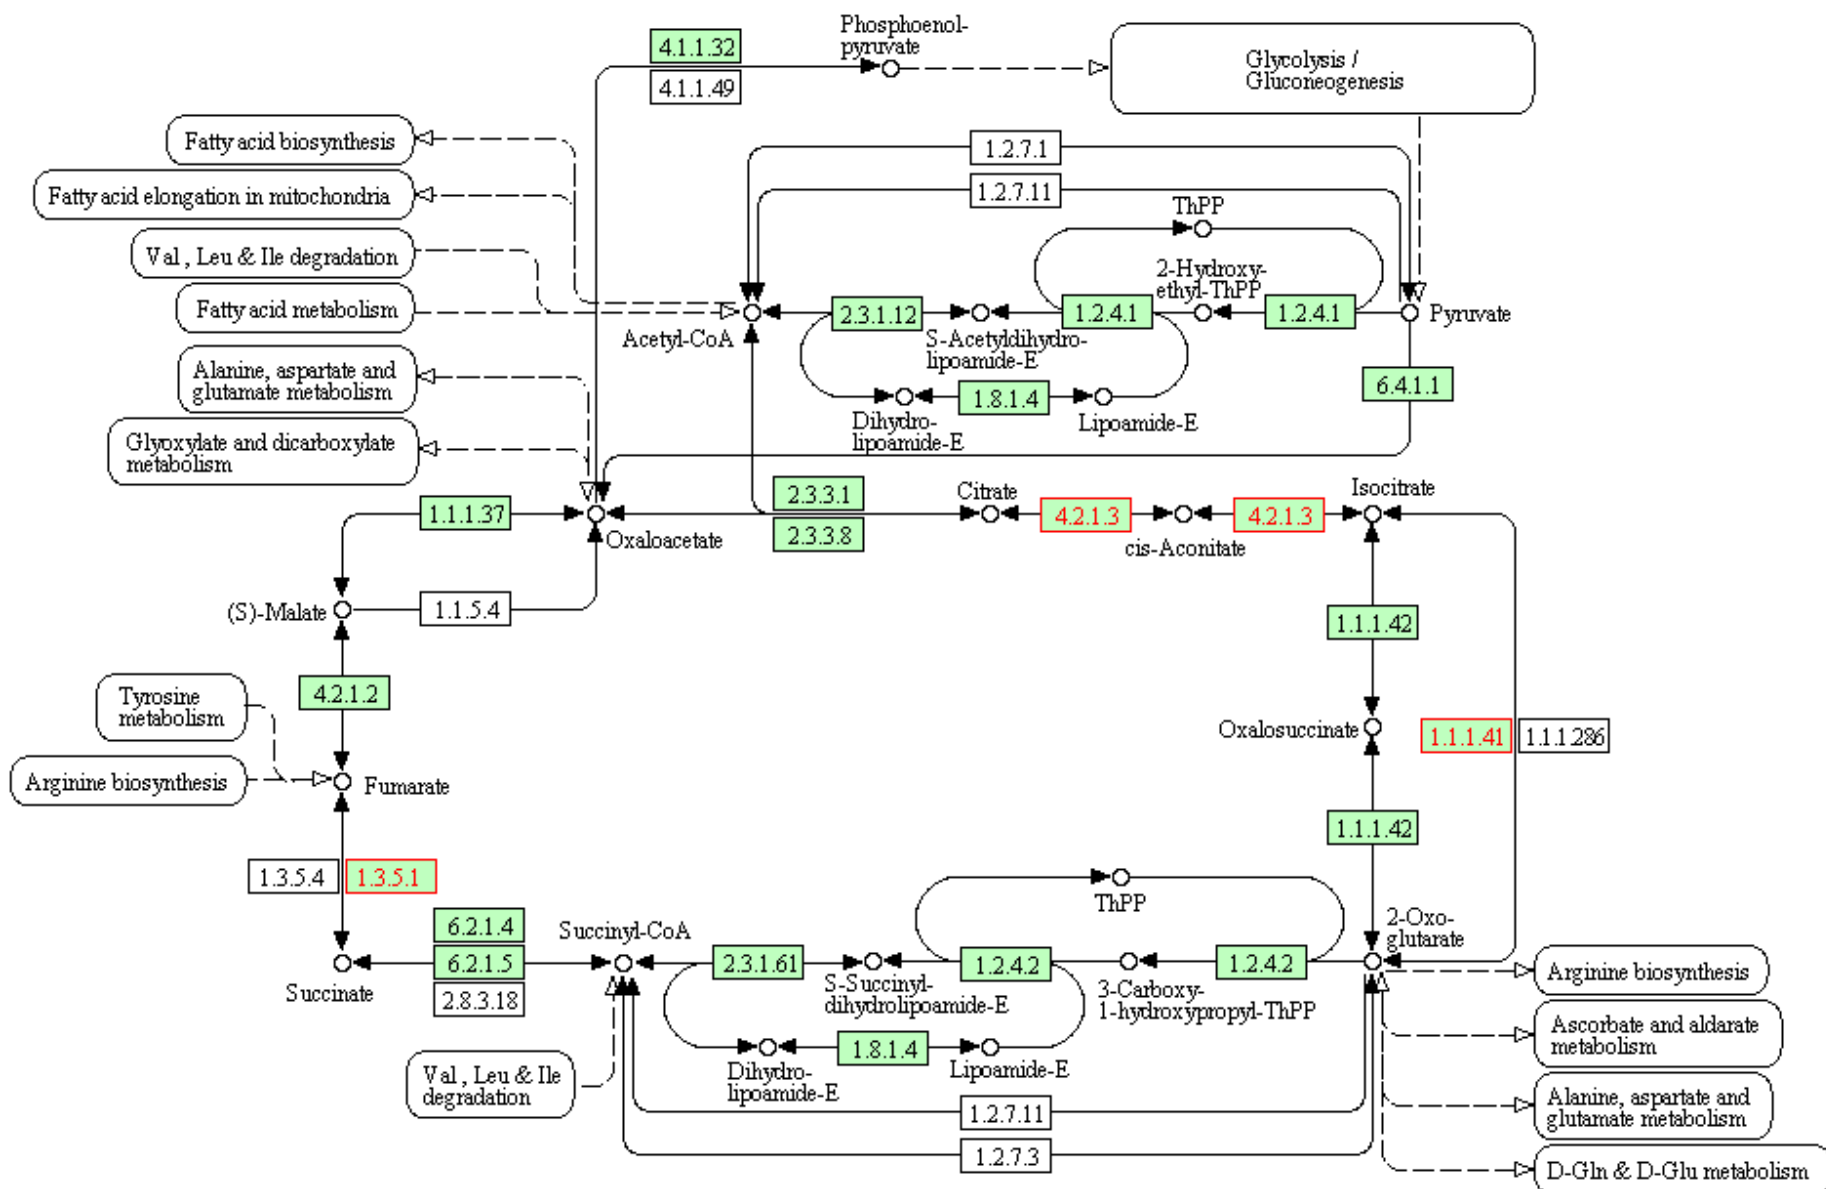

# P53 SIGNALING PATHWAY

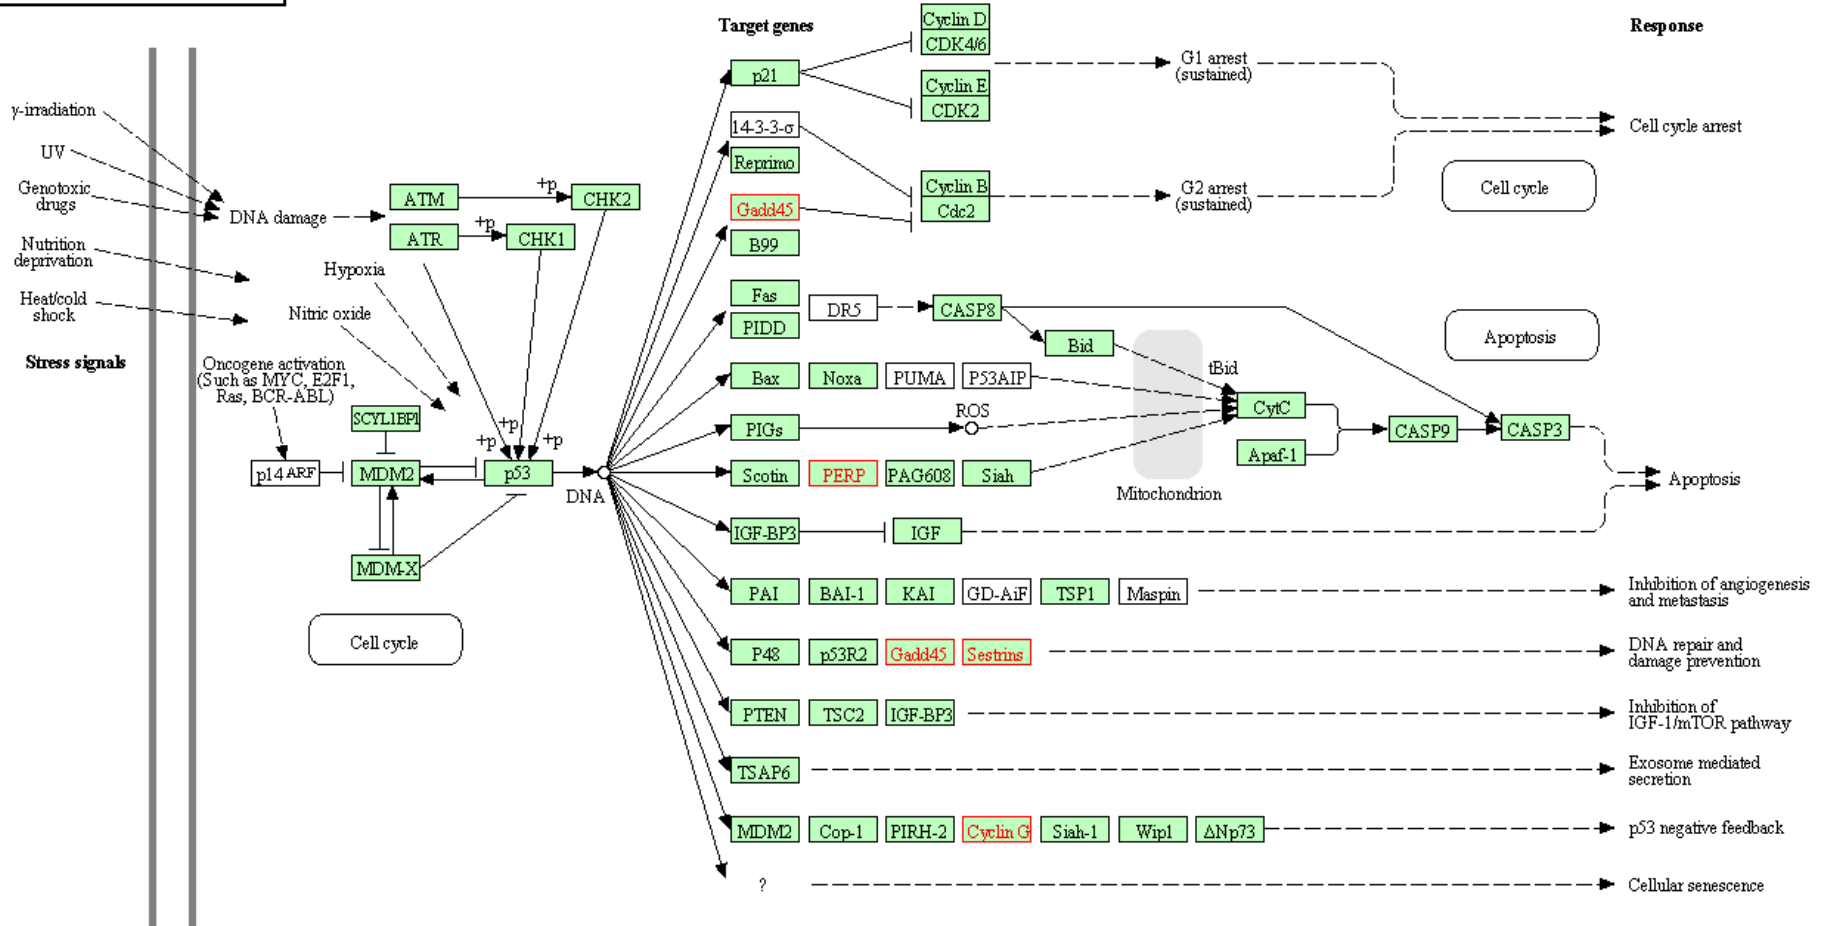



**FOCAL ADHESION**

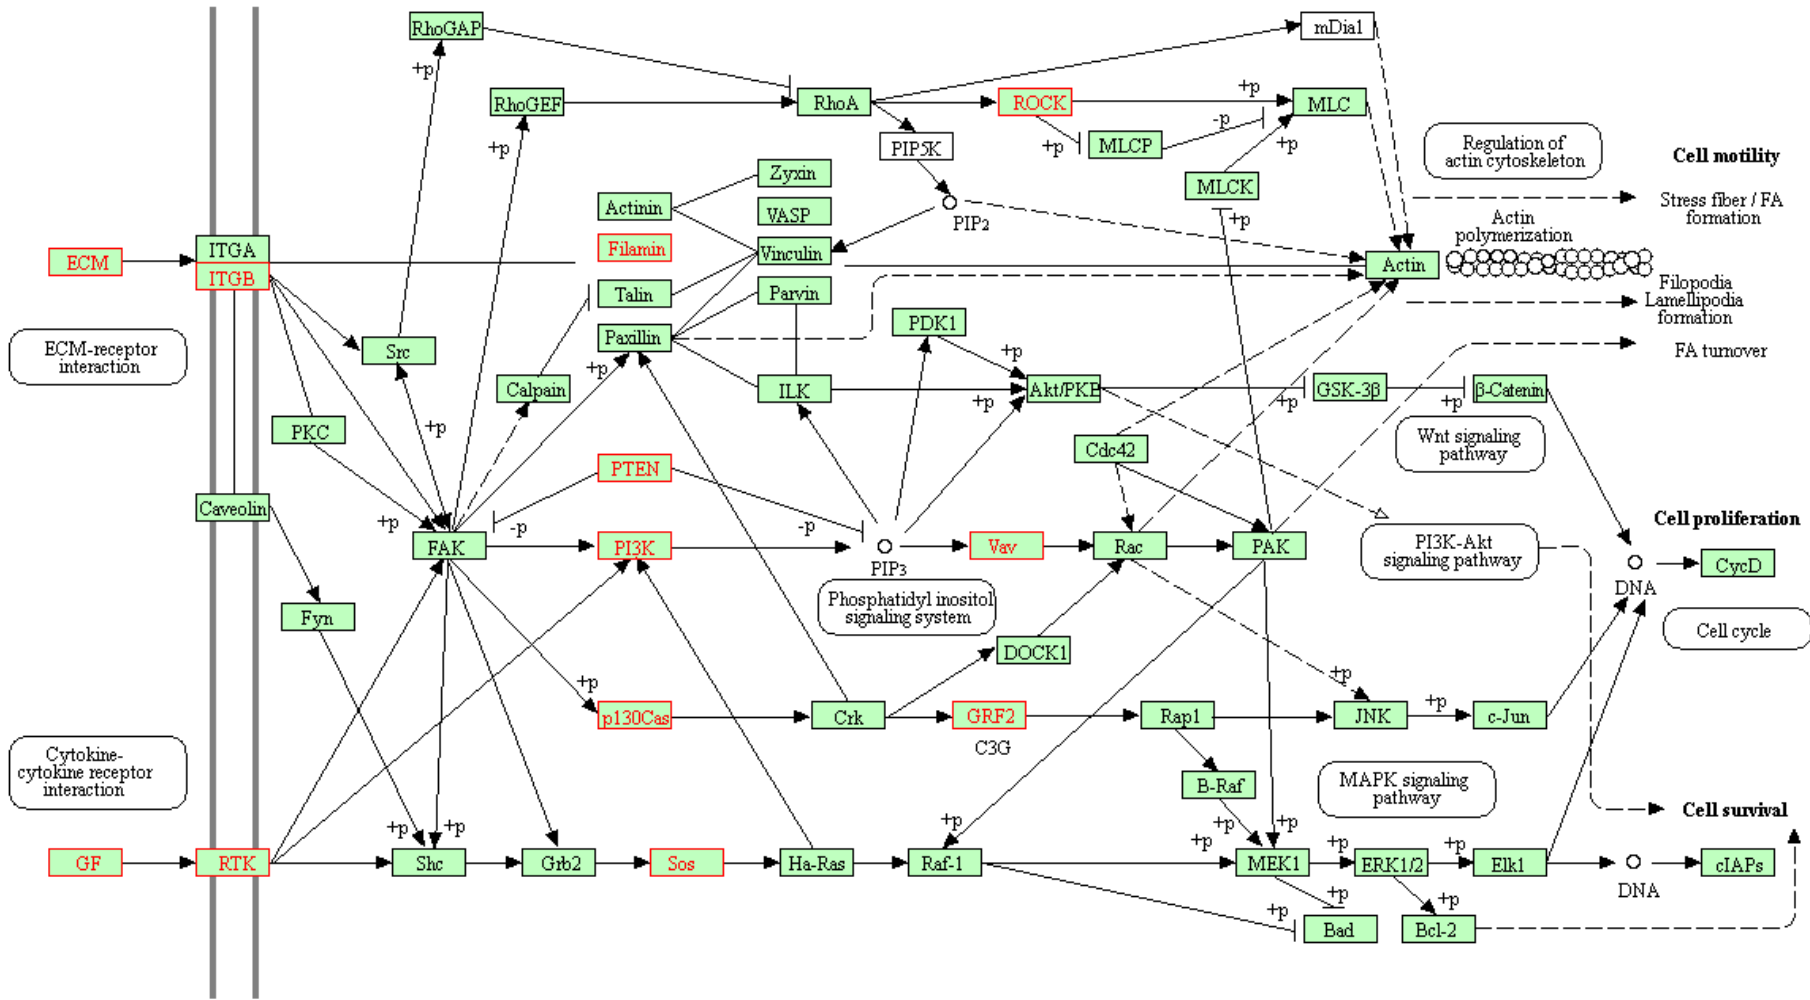

# NOTCH SIGNALING PATHWAY

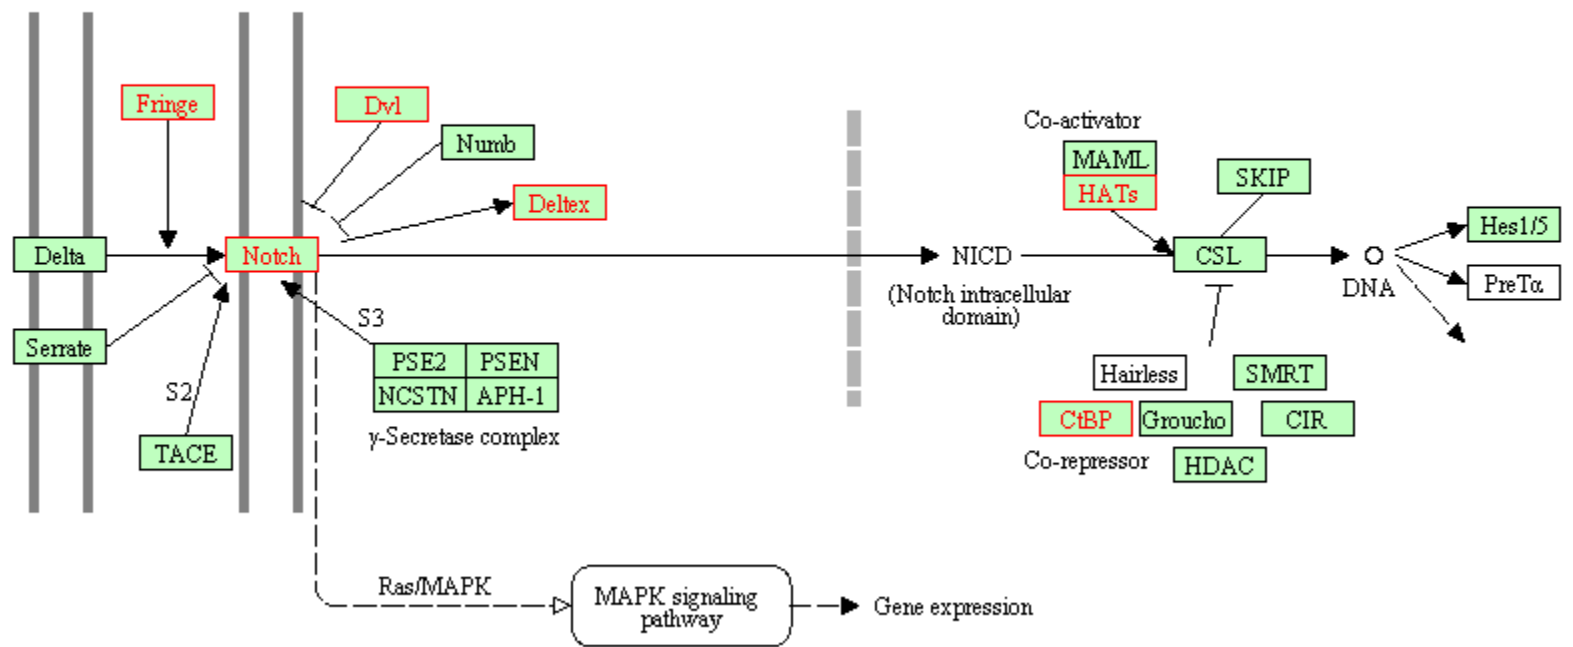

REGULATION OF ACTIN CYTOSKELETON

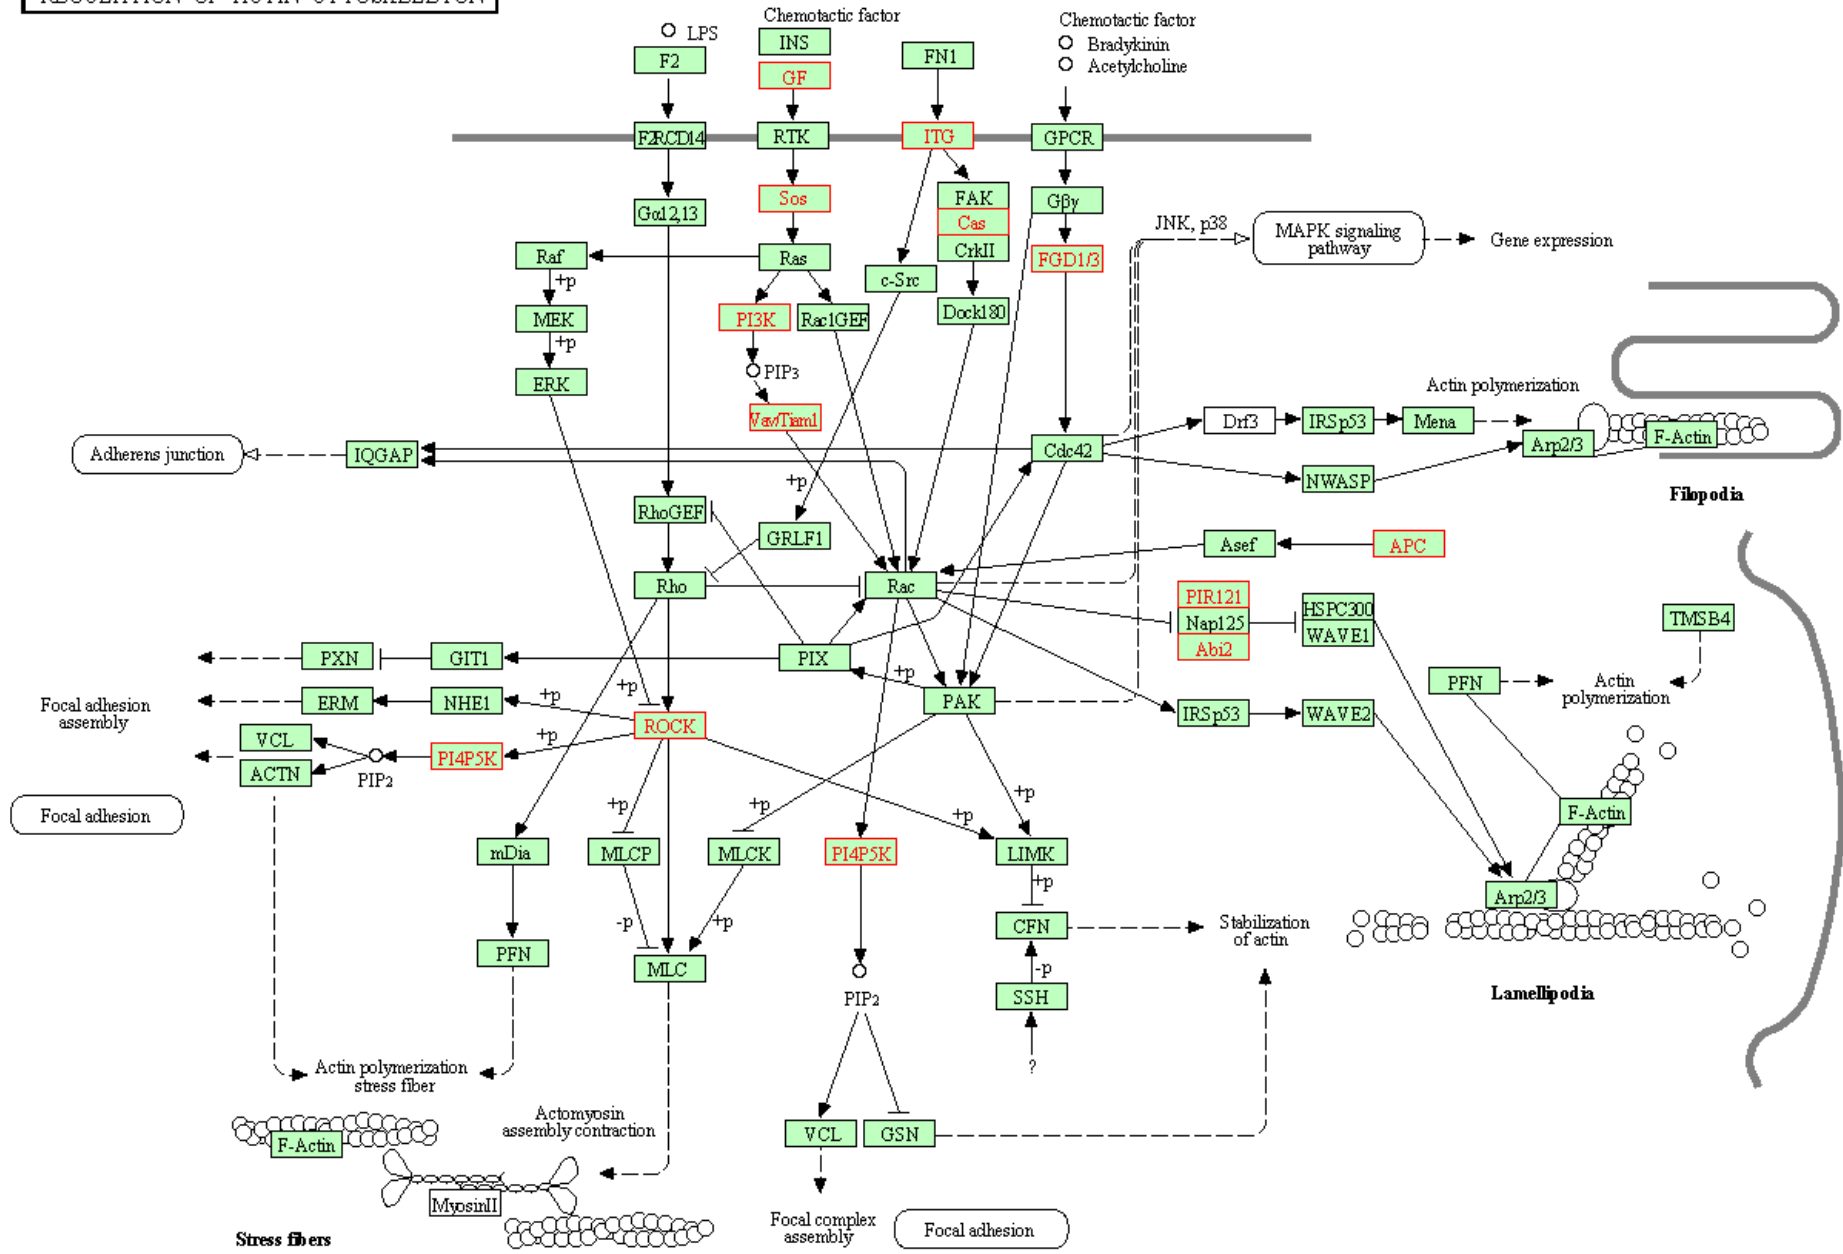

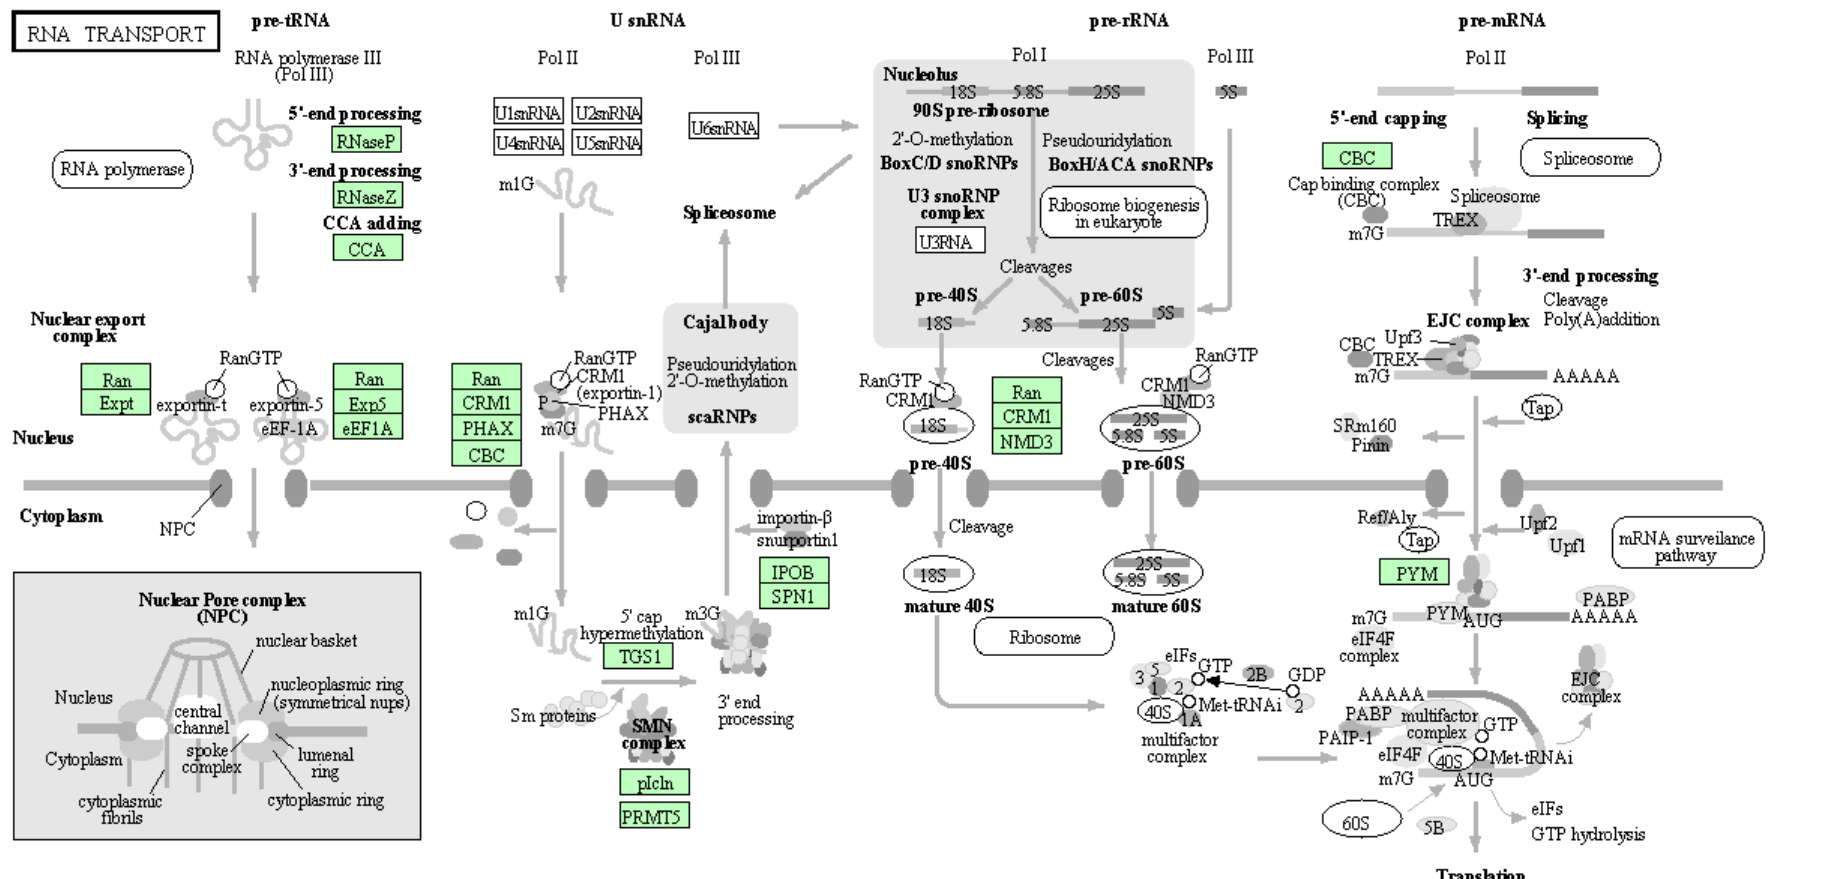

# SPLICEOSOME

## Spliceosome components

pre-mRNA  
 5' splice site Exon GU Branch point A 3' splice site Exon AG Intron

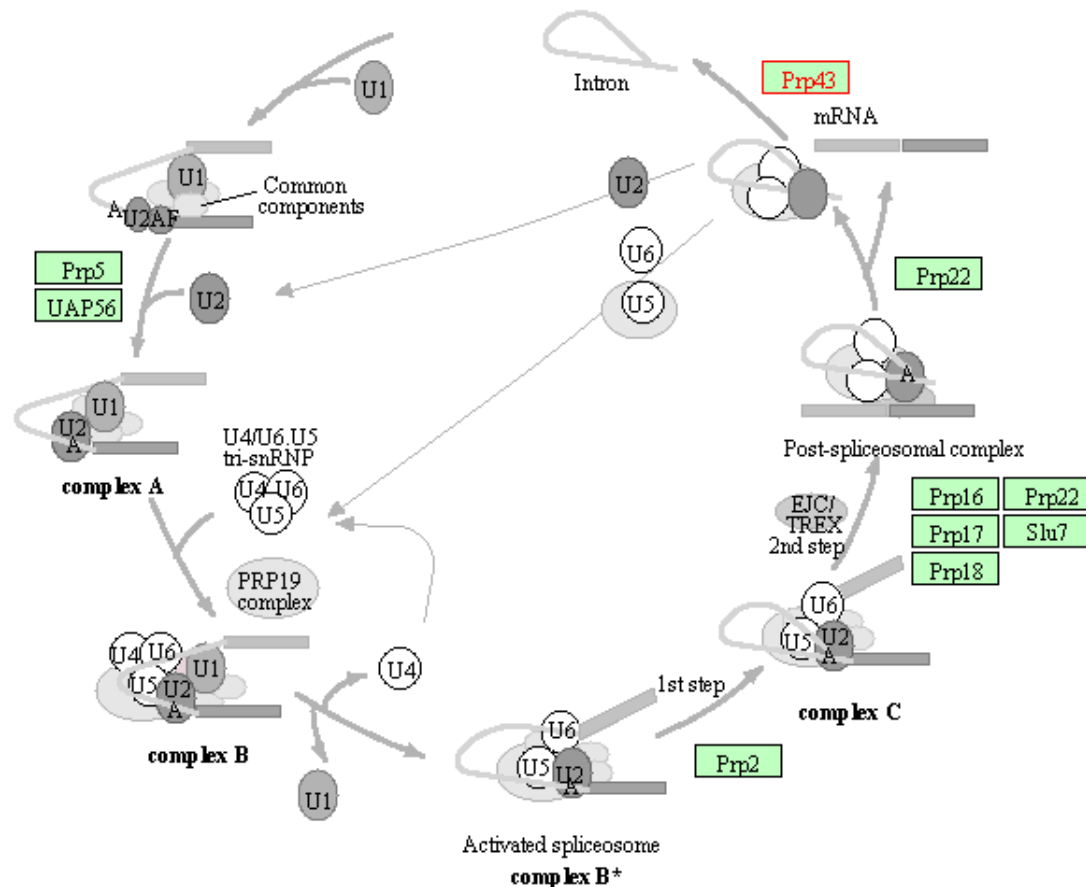

| U1                 | U2            | U4/U6                          | U5                |
|--------------------|---------------|--------------------------------|-------------------|
| U1snRNA            | U2snRNA       | U4snRNA                        | U5snRNA           |
| Sm                 | Sm            | U6snRNA                        | Sm                |
| U1-70K             | U2A'          | Lsm                            | Snu114            |
| U1A                | U2B''         | Sm                             | Brr2              |
| U1C                | SF3a          | Prp3                           | Prp6              |
| U1 related         | SF3b          | Prp4                           | Prp8              |
| FBP11              | U2 related    | CypH                           | Prp8BP            |
| S164               | U2AF          | Prp31                          | Prp28             |
| p68                | PUF60         | Snu13                          | DIB1              |
| CA150              | SPF30         | U4/U6, U5 tri-snRNP associated |                   |
|                    | SPF45         | 5nRNP27                        |                   |
|                    | CHERP         | Sad1                           |                   |
|                    | SR140         | Snu66                          |                   |
|                    | Prp43         | Snu23                          |                   |
|                    | PAP-1         | Prp38                          |                   |
|                    |               | PAP-1                          |                   |
| Prp19 complex      | Prp19 related | EJC/TREX                       | Common components |
| Prp19              | SKIP          | ACINUS                         | CBP80/20          |
| CDC5               | Syf           | eIF43                          | hnRNPs            |
| SPF27              | Isy1          | Y14                            | SR                |
| PRL1               | PPIL1         | magoh                          |                   |
| AD002              | CypE          | UAP56                          |                   |
| CTNNE1             | CCDC12        | THOC                           |                   |
| HSP73              | RBM22         |                                |                   |
| Complex B specific | G10           |                                |                   |
| NPW38              | AQR           |                                |                   |
| NPW3BP             |               |                                |                   |

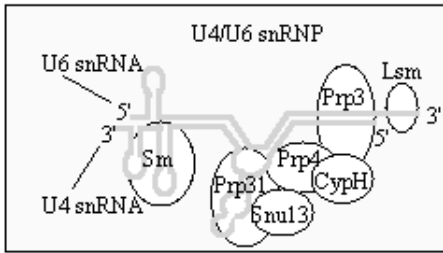

**mRNA SURVEILLANCE PATHWAY**

pre-mRNA RNA polymerase II

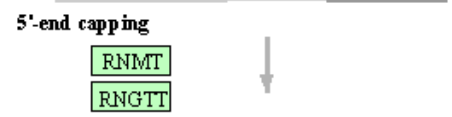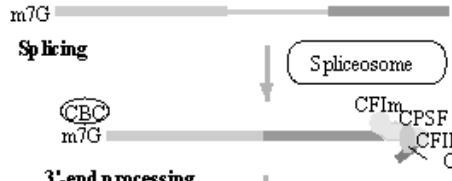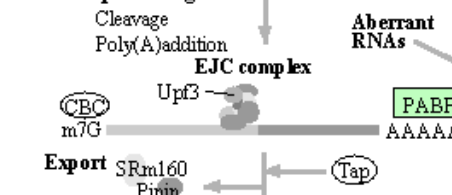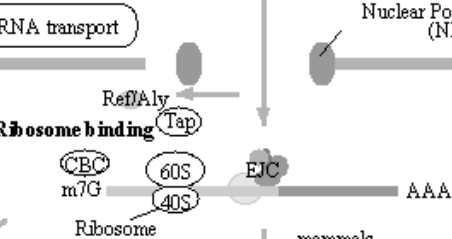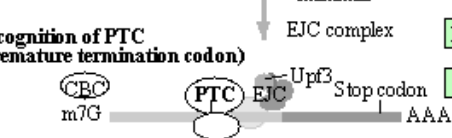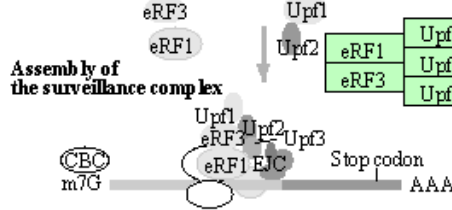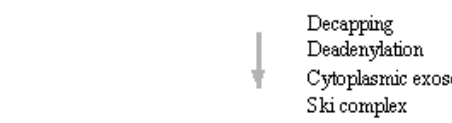

Decapping  
Deadenylation  
Cytoplasmic exosome  
Ski complex  
RNA degradation

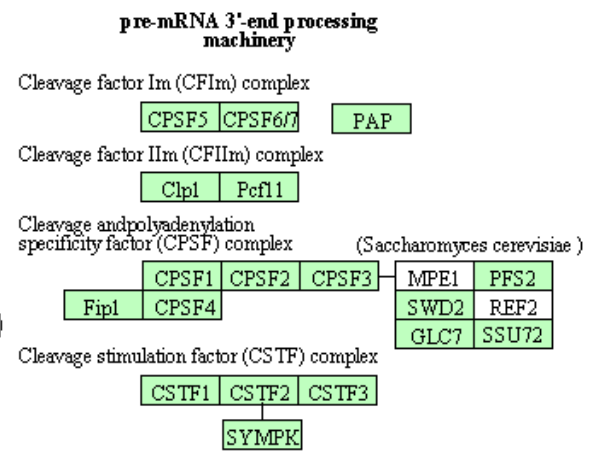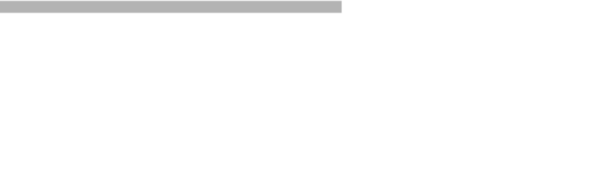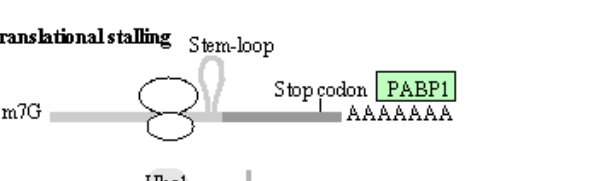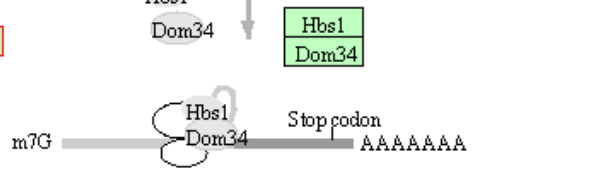

Cytoplasmic exosome  
Ski7

- Cap binding complex (CBC)**
- CBP80
  - CBP20
- Exon-junction complex (EJC)**
- Upf3
  - Y14
  - MAGOH
  - MLN51
  - EIF4A3
  - SAP18
  - Pinin
  - ACIN1
  - RNPS1
  - RefAly
- Transiently interacting factors**
- Tap
  - p15
  - UAP56
  - PYM
  - SRm160

**Nucleus**

**Cytoplasm**

**Nonstop decay (NSD)**

**Nonsense-mediated decay (NMD)**

**No-go decay (NGD)**

ECM-RECEPTOR INTERACTION

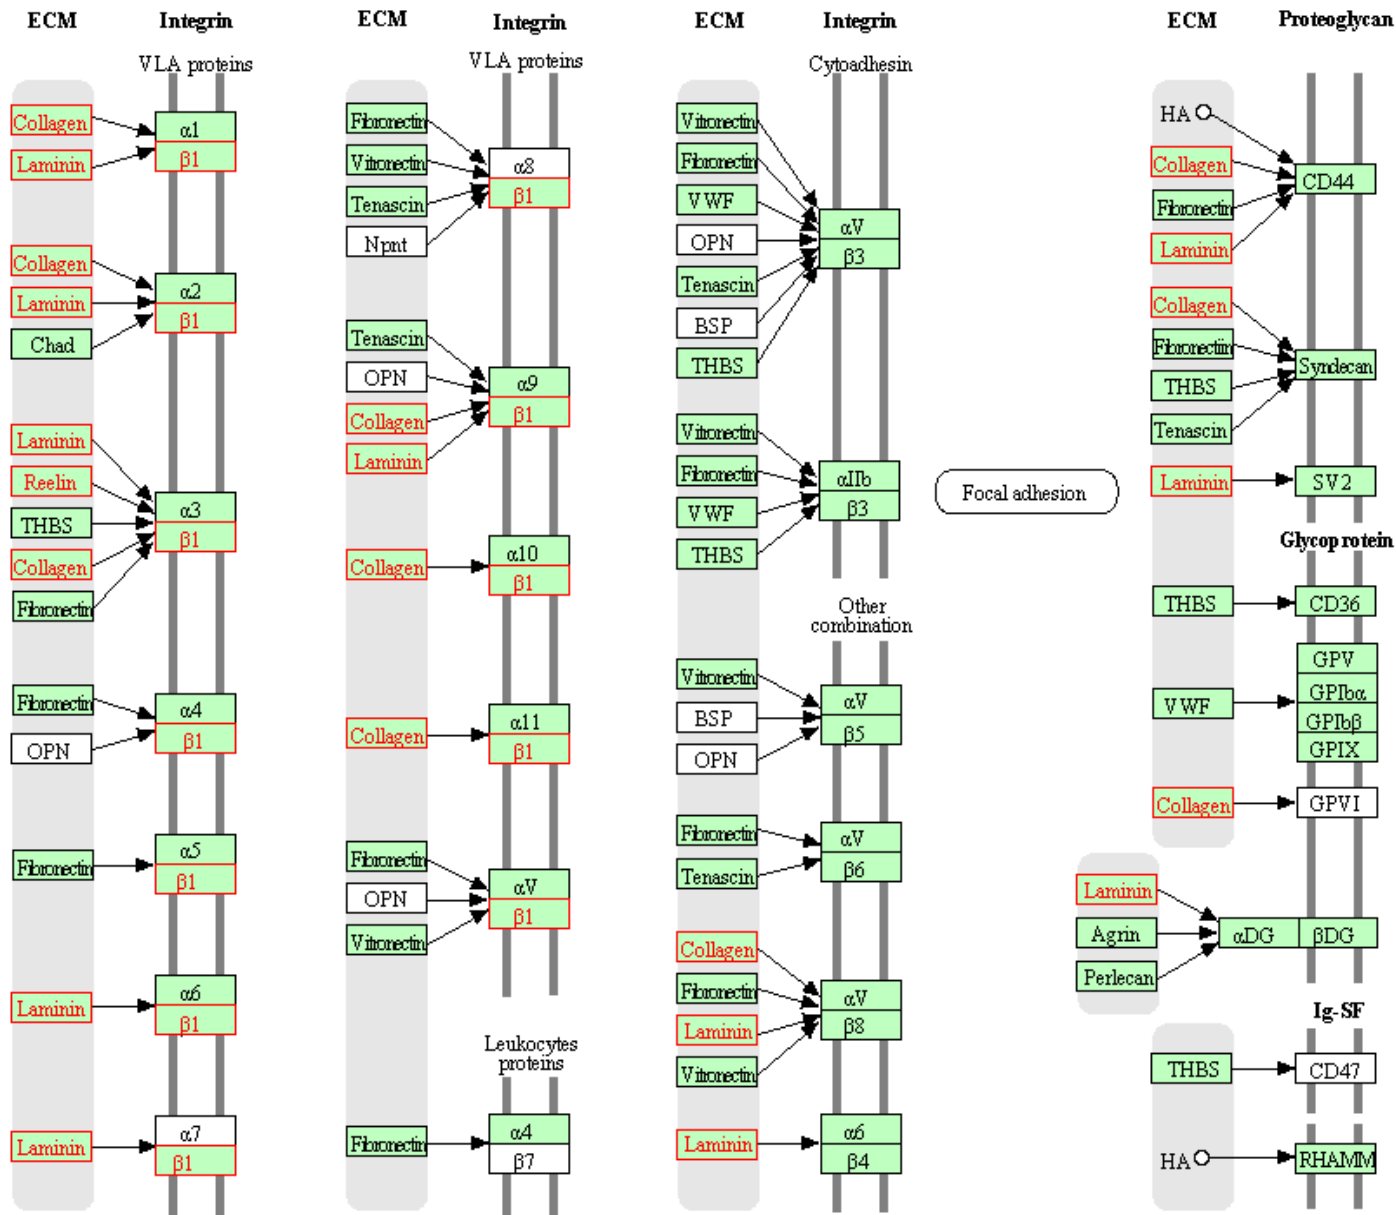

**UBIQUITIN MEDIATED PROTEOLYSIS**

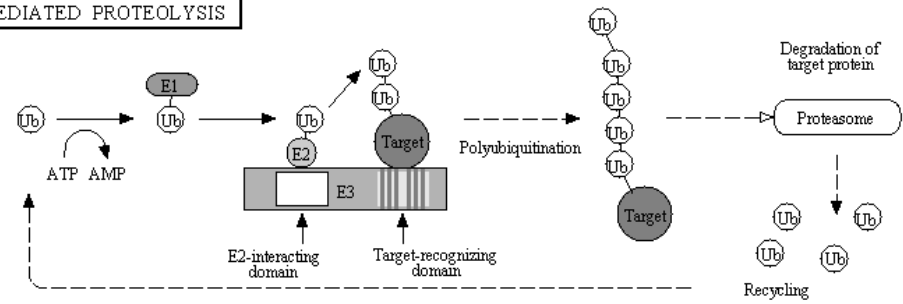

- E1**  
(Ubiquitin-activating enzyme)
- UBE1
  - UBE1A
  - UBE1B
  - UBE1C

- E2**  
(Ubiquitin-conjugating enzyme)
- UBE2A
  - UBE2B
  - UBE2C
  - UBE2E
  - UBE2F
  - UBE2G1
  - UBE2G2
  - UBE2H
  - UBE2I
  - UBE2J1
  - UBE2J2
  - UBE2L3
  - UBE2L6
  - UBE2M
  - UBE2N
  - UBE2O
  - UBE2Q
  - UBE2R
  - UBE2S
  - UBE2U
  - UBE2W
  - UBE2Z
  - HIP2
  - APC10N

**E3**  
(Ubiquitin ligase)

**HECT type E3**

|      |       |        |       |         |
|------|-------|--------|-------|---------|
| E6AP | UBE3B | UBE3C  | Smurf | Itrh    |
| WWP1 | WWP2  | TRIP12 | NEDD4 | ARF-BP1 |
| EDD1 | HERC1 | HERC2  | HERC3 | HERC4   |

**U-box type E3**

|       |       |      |
|-------|-------|------|
| UBE4A | UBE4B | CHIP |
| CYC4  | PRP19 | UIP5 |

**single RING-finger type E3**

|       |       |        |        |        |        |       |
|-------|-------|--------|--------|--------|--------|-------|
| Mdm2  | CBL   | Parkin | SH3BP1 | PML    | TRAF6  | MEKK1 |
| COP1  | PIRH2 | cIAPs  | PIAS   | SYVN   | NHLRC1 | AIRE  |
| MGRN1 | BRCA1 | FANCL  | MID1   | Trim32 | Trim37 |       |

**multi subunit RING-finger type E3**

**Cullin-Rbx E3**

|              | RING finger | Cullin | Adaptor protein | Target recognizing subunit |
|--------------|-------------|--------|-----------------|----------------------------|
| SCF complex  | RBX1        | Cul1   | Skp1            | F-box                      |
| ECV complex  | RBX1        | Cul2   | EloB<br>EloC    | VHLbox                     |
| Cul3 complex | RBX1        | Cul3   |                 | BTB                        |
| Cul4 complex | RBX1        | Cul4   | DDB1            | DCAF                       |
| ECS complex  | RBX2        | Cul5   | EloB<br>EloC    | SOC3box                    |
| Cul7 complex | RBX1        | Cul7   | Skp1            | Fbxw8                      |

**APC/C**

|       | RING finger | Cullin | Adaptor protein | Target recognizing subunit | Other subunits                                                                          |
|-------|-------------|--------|-----------------|----------------------------|-----------------------------------------------------------------------------------------|
| APC/C | Apc11       | Apc2   | ?               | Cdc20                      | Apc1<br>Apc3<br>Apc4<br>Apc5<br>Apc6<br>Apc7<br>Apc8<br>Apc9<br>Apc10<br>Apc12<br>Apc13 |
|       |             |        |                 | Cdh1                       |                                                                                         |



# JAK-STAT SIGNALING PATHWAY

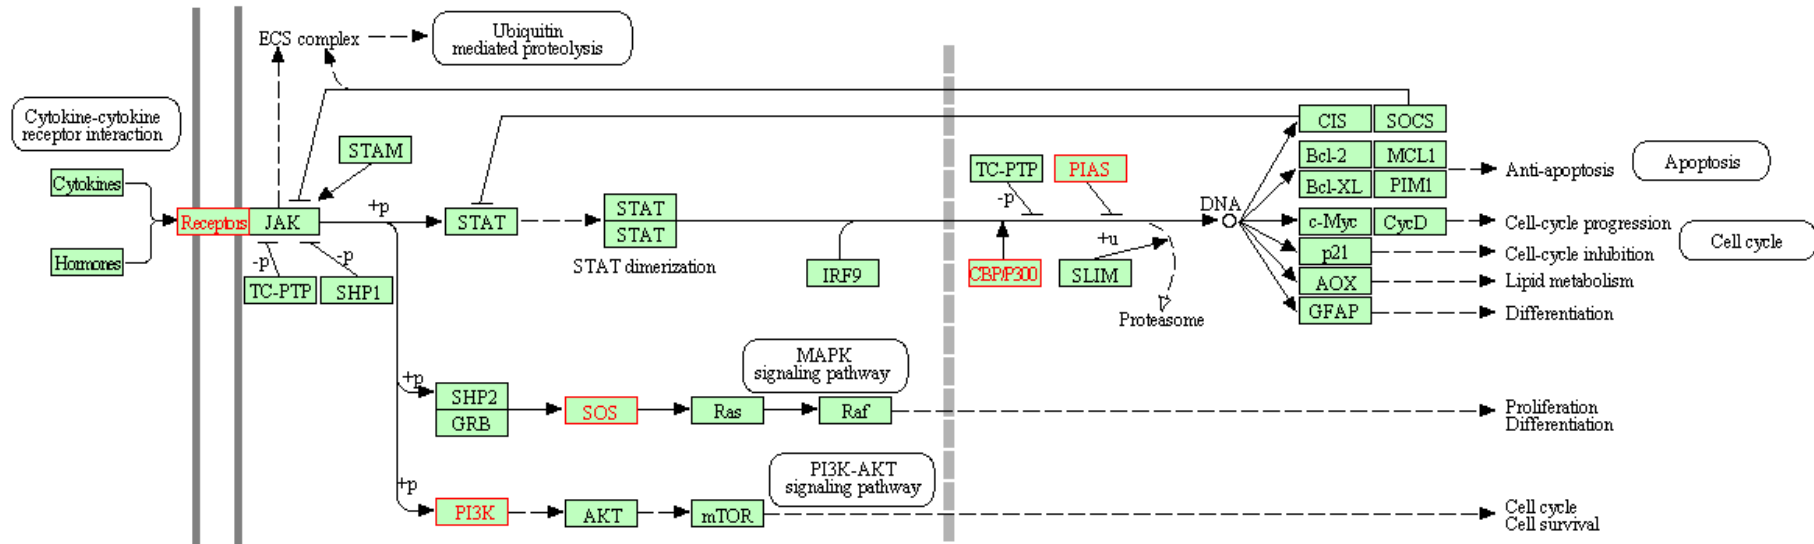

# WNT SIGNALING PATHWAY

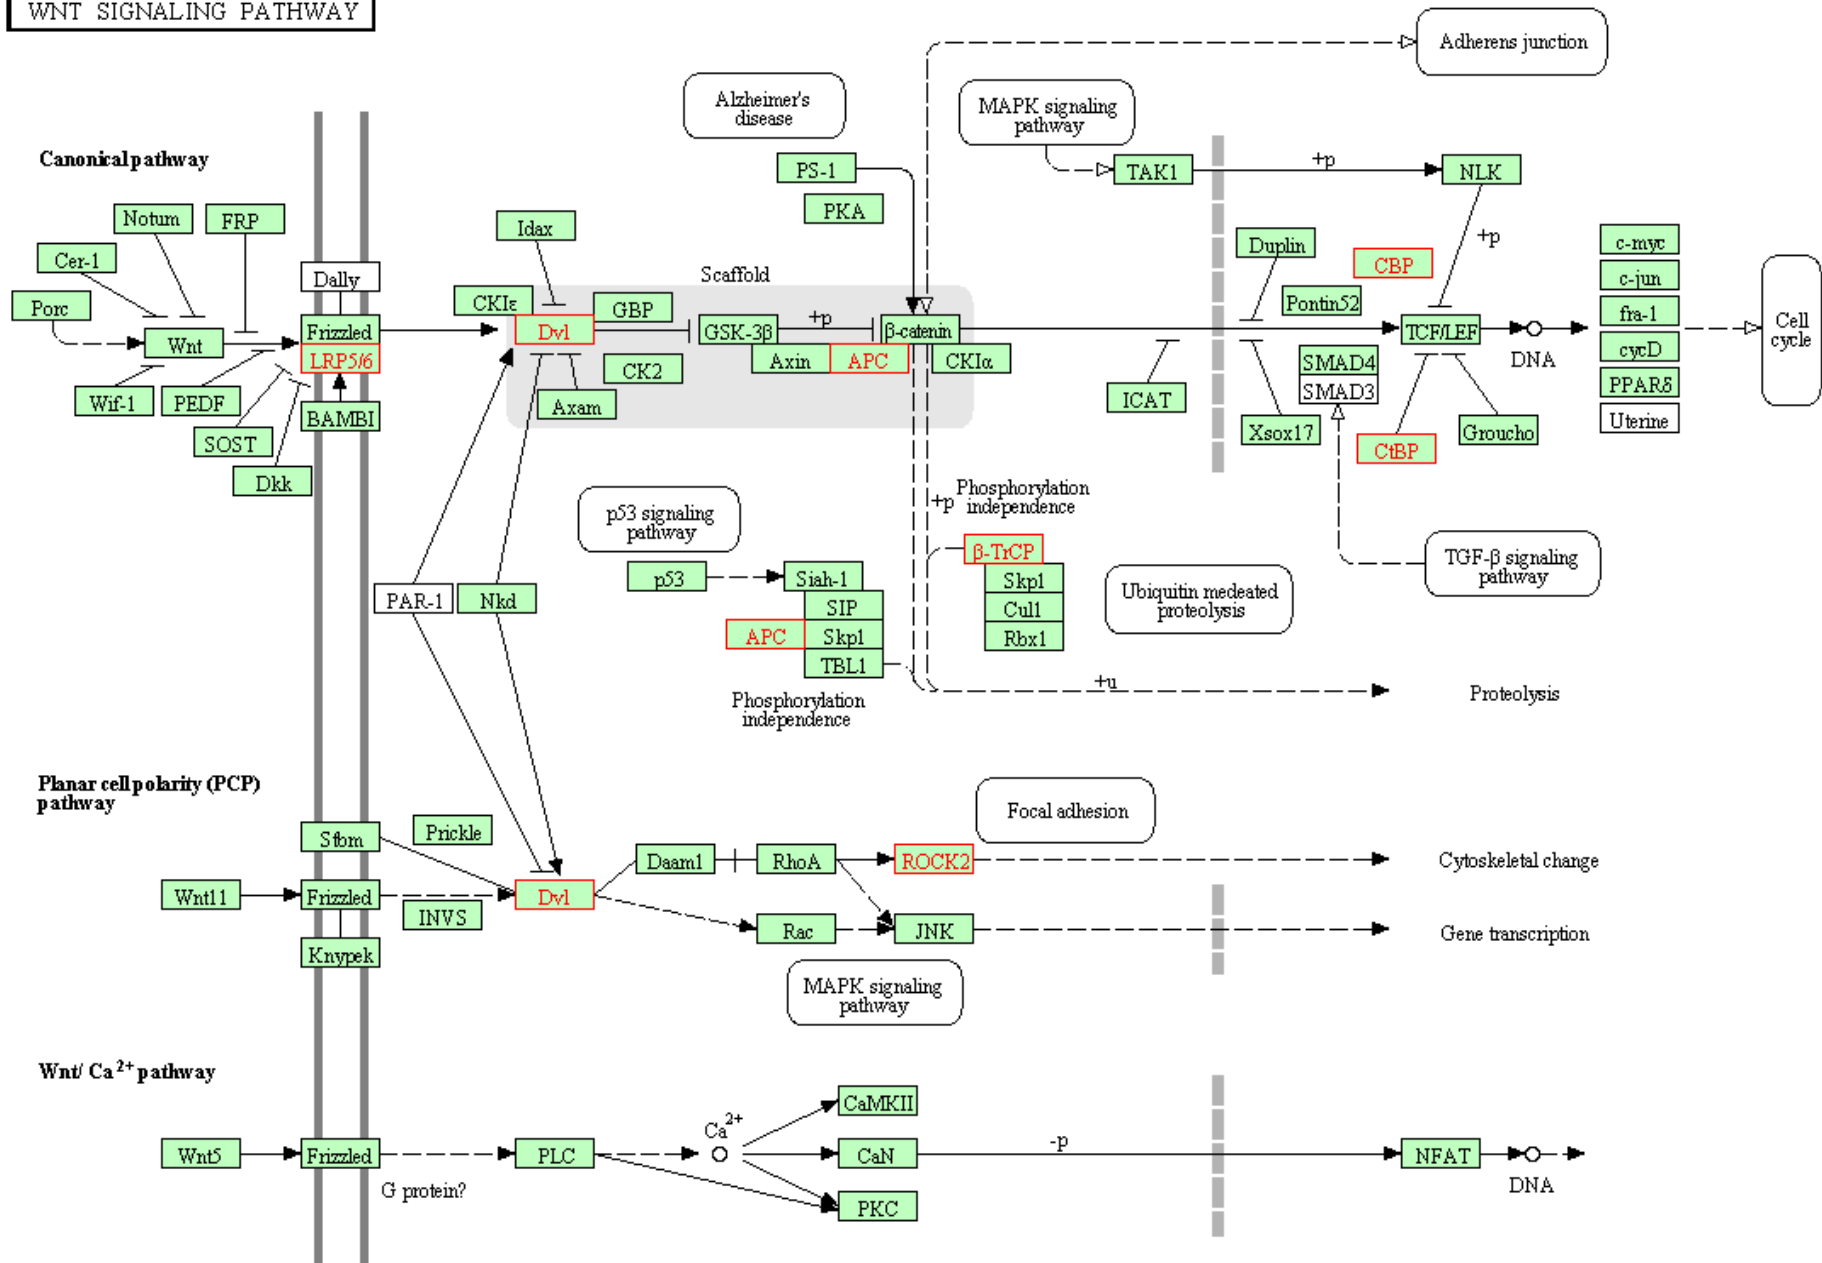

# MAPK SIGNALING PATHWAY

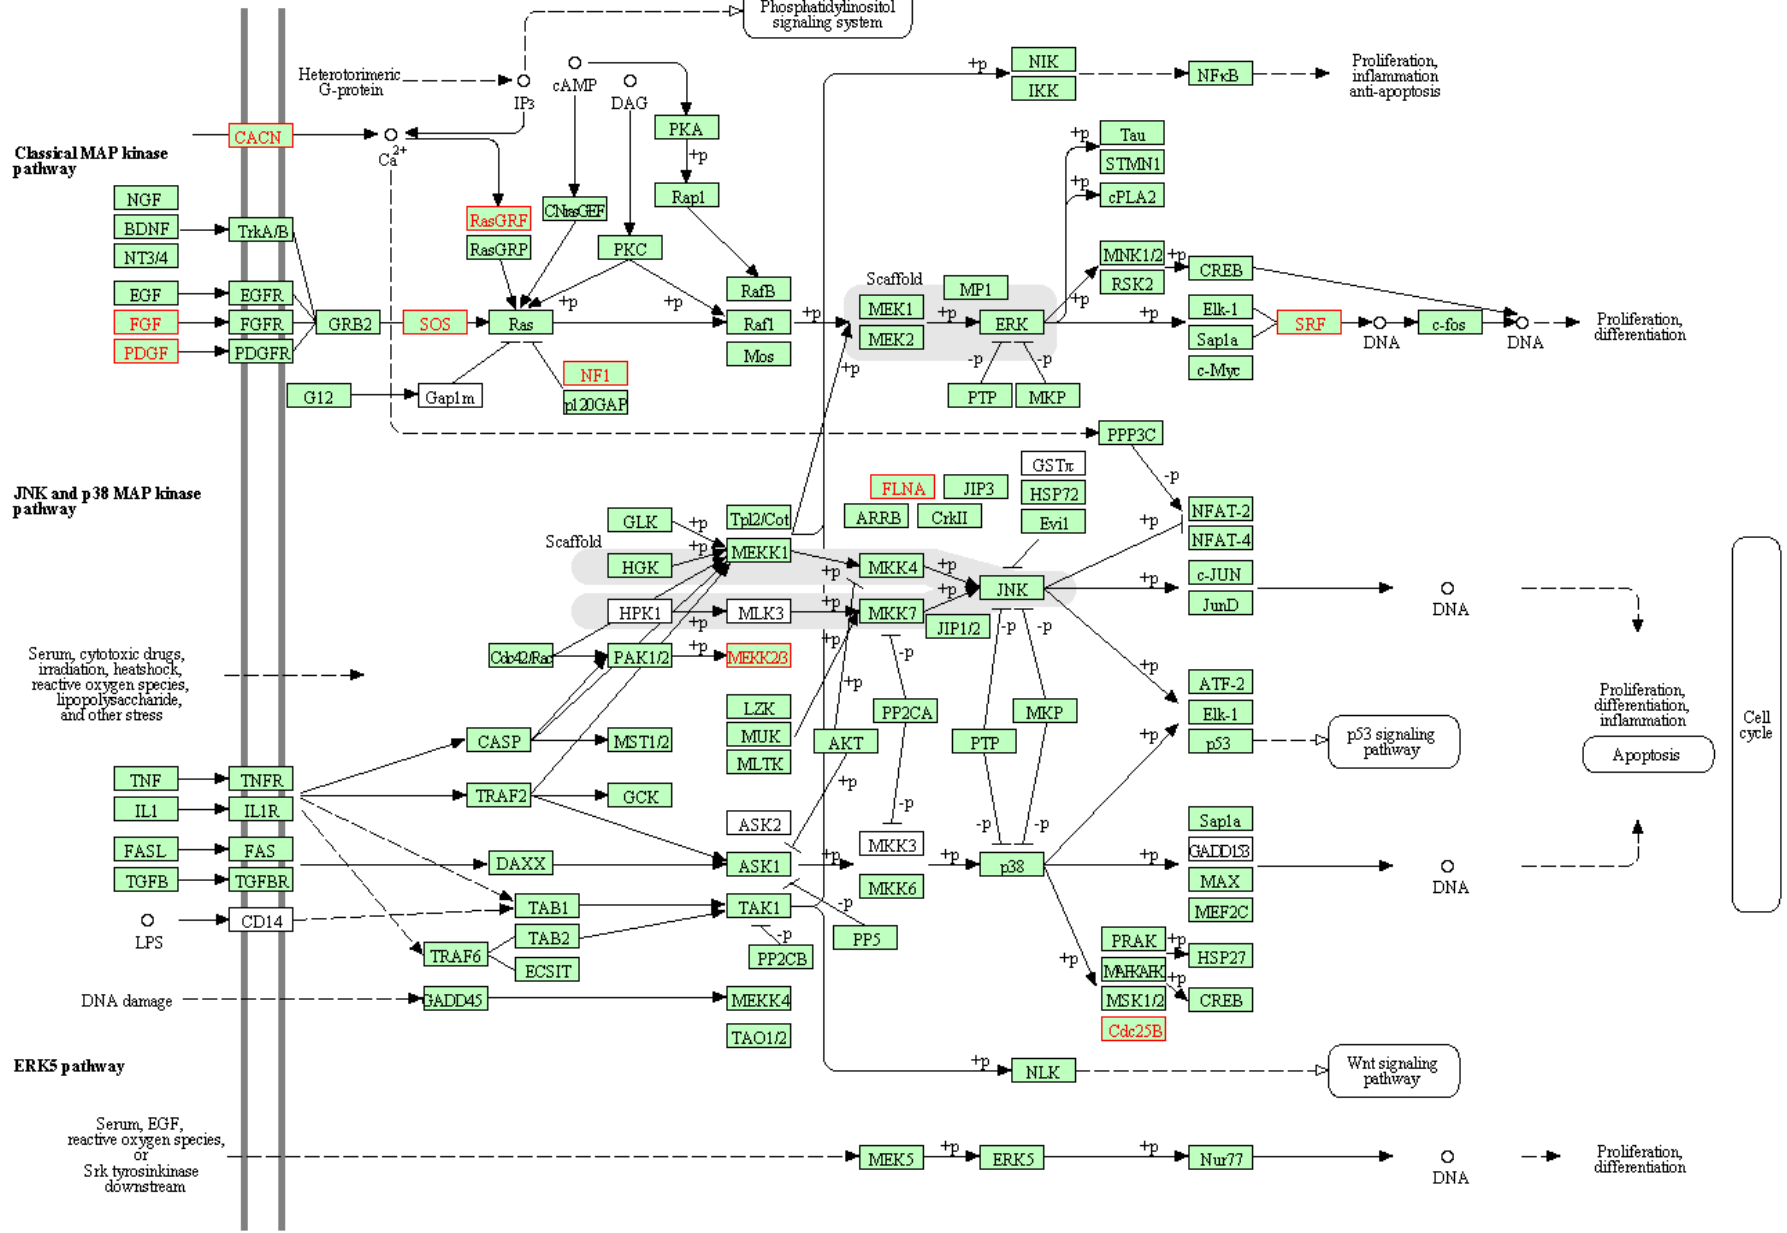

MAPKKKK    MAPKKK    MAPKK    MAPK    Transcription factor

# PROGESTERONE-MEDIATED OOCYTE MATURATION

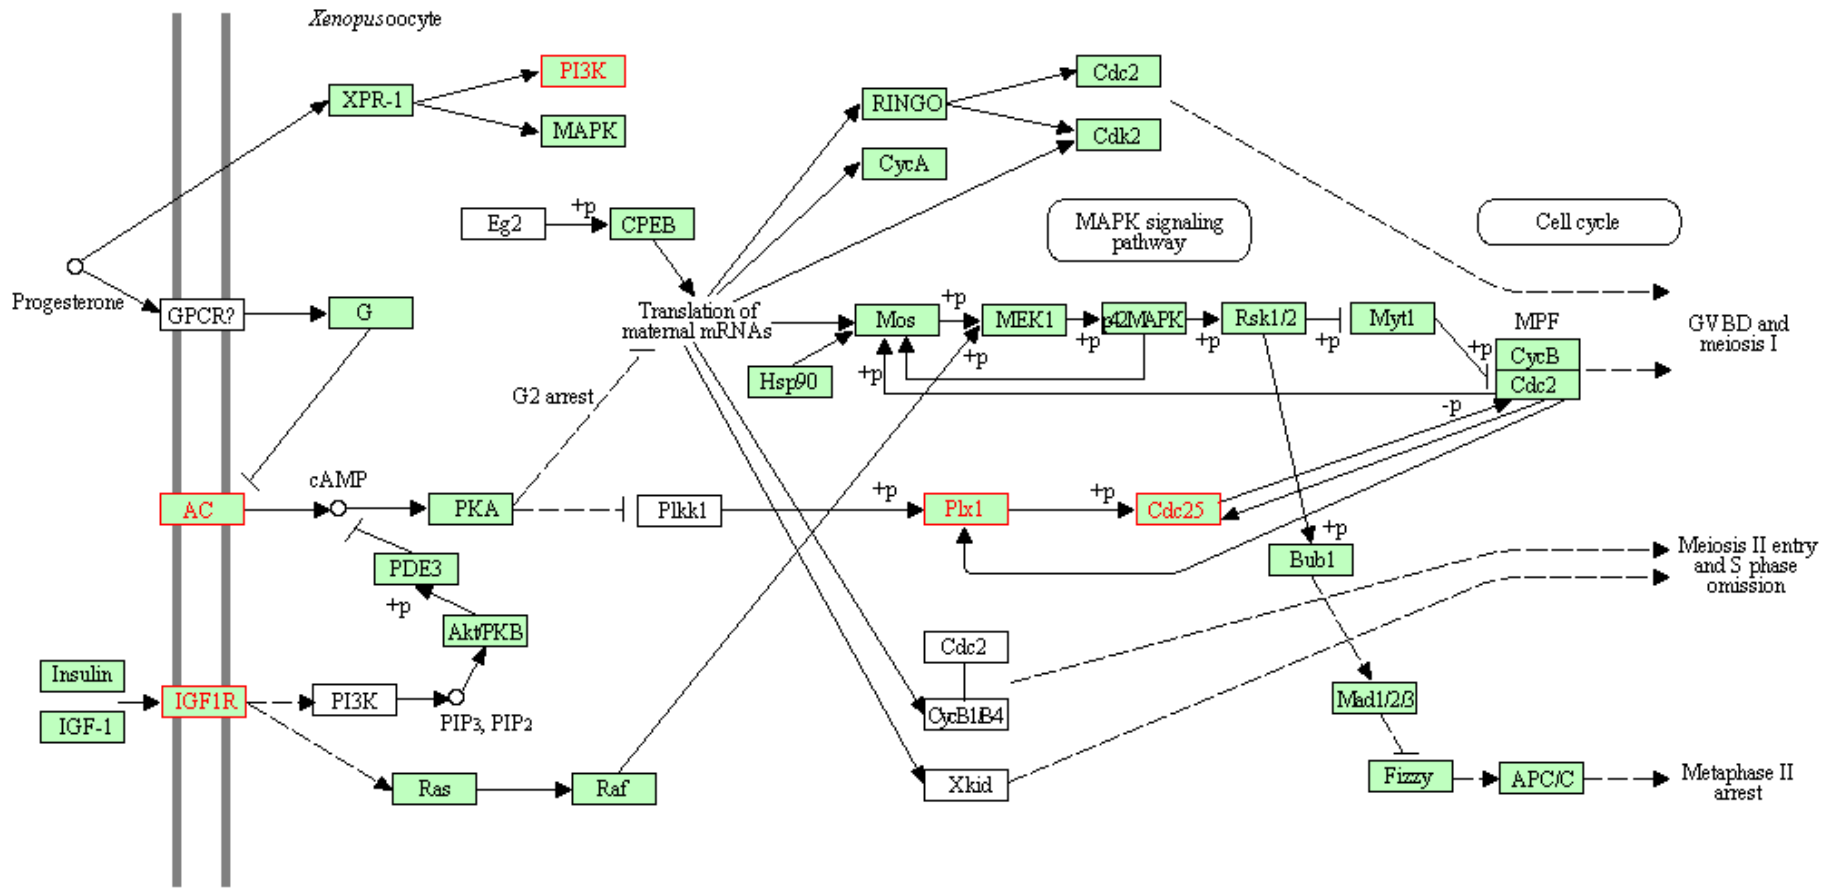

# CELL ADHESION MOLECULES

## IMMUNE SYSTEM

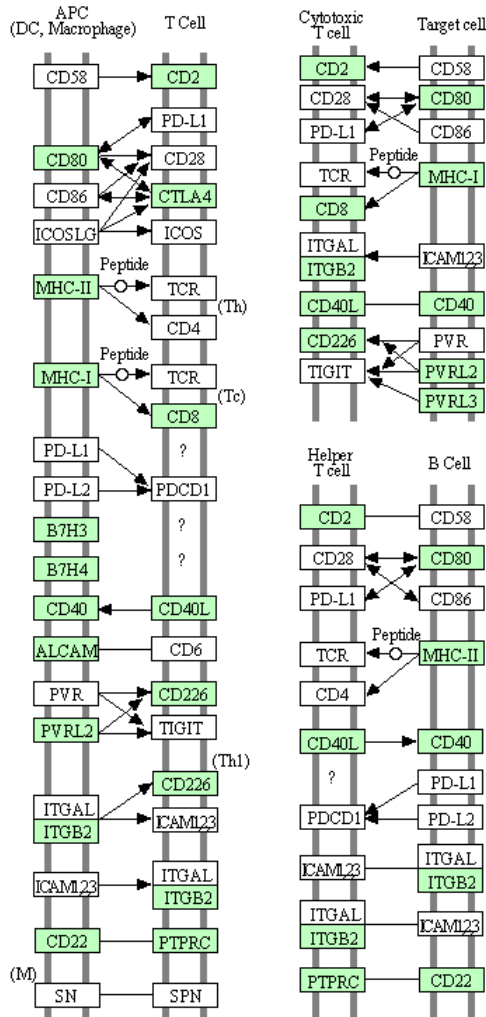

T cell receptor signaling pathway

## Endothelial cells

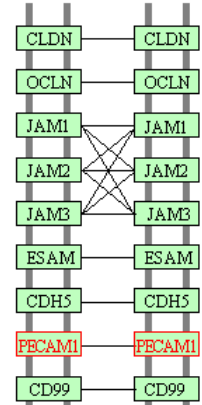

Tight junction

Leukocyte transendothelial migration

## Leukocyte

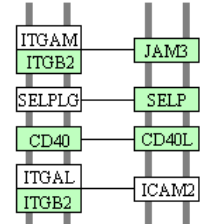

## Platelet

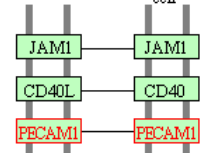

Complement and coagulation cascade

## Leukocyte

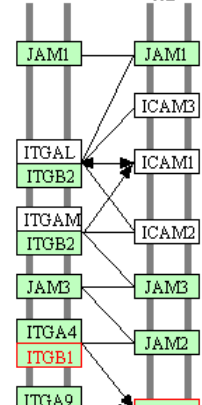

Leukocyte transendothelial migration

## NEURAL SYSTEM

### Neuron (presynaptic)

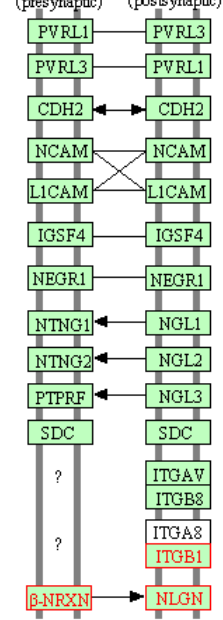

### Neuron (postsynaptic)

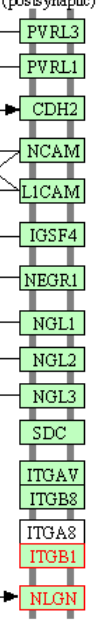

### Neuron (growth cone)

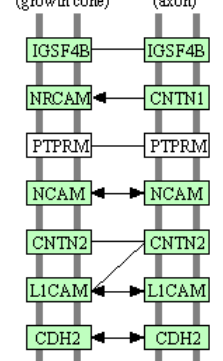

### Schwann cell (myelin)

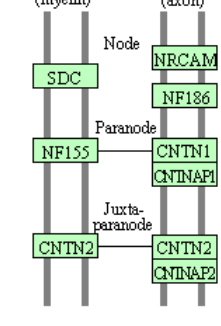

### Schwann cell (myelin)

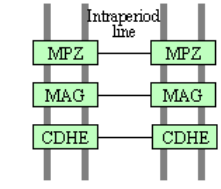

### Oligodendrocyte (myelin)

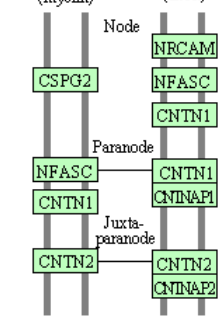

### Oligodendrocyte (myelin)

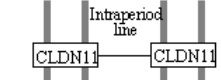

## OTHER SYSTEMS

### Epithelial cells

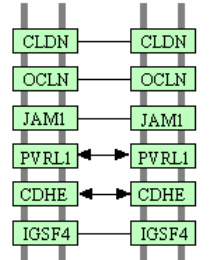

Tight junction

Adherens junction

### Spermatid

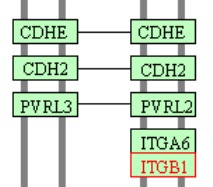

### Sertoli cell

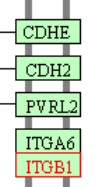

### Ciliary body

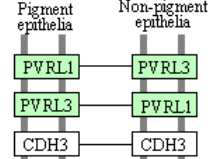

### Pigment epithelia

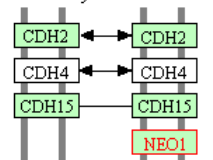

### Non-pigment epithelia

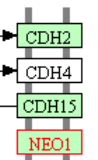

### Myoblasts

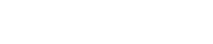

Supplement: 12915_2017_354_MOESM4_ESM.pdf [file 12915_2017_354_MOESM4_ESM.pdf]
