# Supplementary material for: MicroRNA miR-29 controls a compensatory response to limit neuronal iron accumulation during adult life and aging
Source: PubMed Central journal article supplement (PMC5304403; doi:10.1186/s12915-017-0354-x), 2017-02-13
Supplement: 12915_2017_354_MOESM1_ESM.pdf [file 12915_2017_354_MOESM1_ESM.pdf]

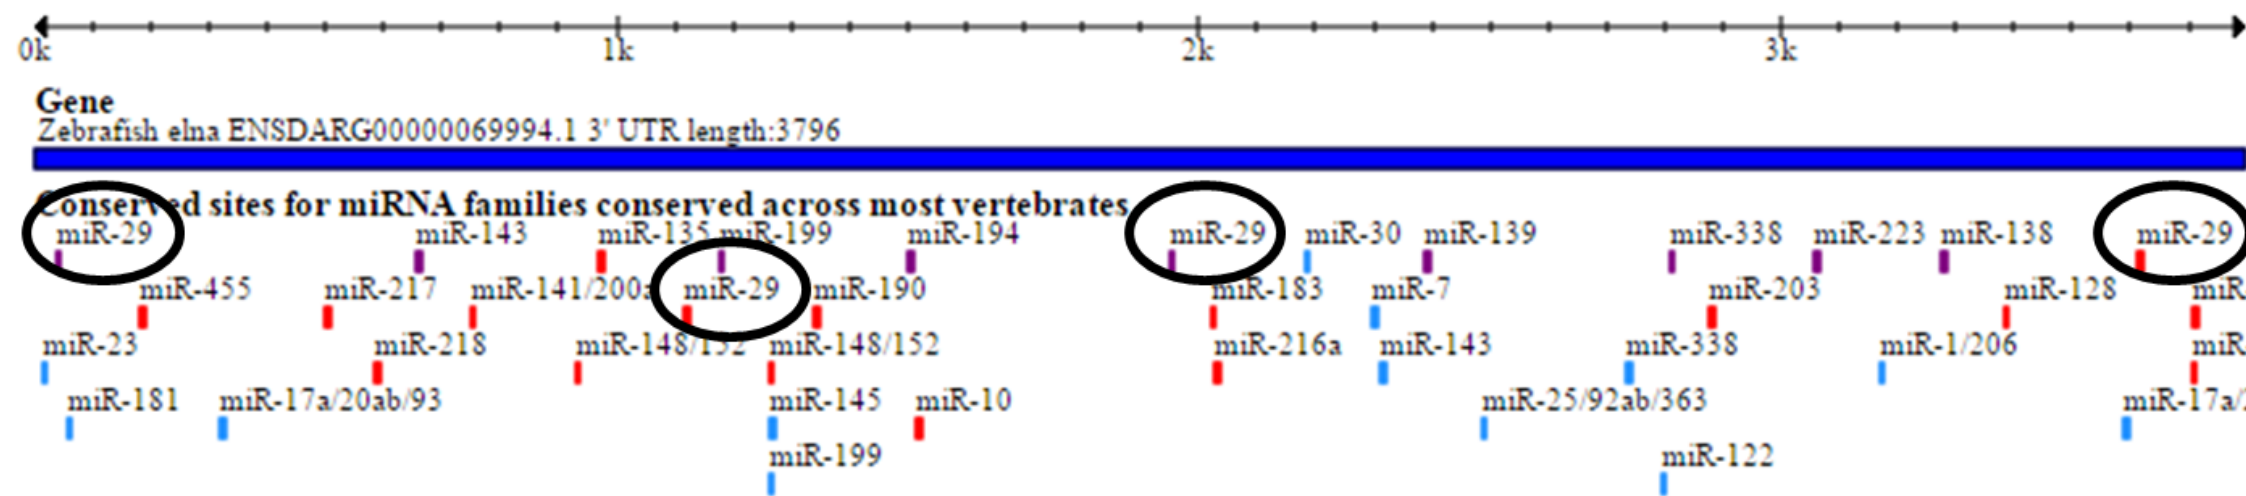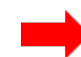

| miRNA           | Sites |      |         |         | Total Context score |
|-----------------|-------|------|---------|---------|---------------------|
|                 | Total | 8mer | 7mer-m8 | 7mer-1A |                     |
| miR-29          | 4     | 2    | 2       | 0       | -1.01               |
| miR-138         | 1     | 1    | 0       | 0       | -0.26               |
| miR-143         | 2     | 1    | 0       | 1       | -0.23               |
| miR-17a/20ab/93 | 3     | 0    | 1       | 2       | -0.21               |
| miR-130/301/454 | 1     | 0    | 1       | 0       | -0.21               |
| miR-455         | 1     | 0    | 1       | 0       | -0.20               |
| miR-148/152     | 2     | 0    | 2       | 0       | -0.17               |
| miR-223         | 1     | 1    | 0       | 0       | -0.13               |
| miR-128         | 1     | 0    | 1       | 0       | -0.13               |
| miR-217         | 1     | 0    | 1       | 0       | -0.13               |
| miR-141/200a    | 1     | 0    | 1       | 0       | -0.13               |
| miR-139         | 1     | 1    | 0       | 0       | -0.11               |
| miR-135         | 1     | 0    | 1       | 0       | -0.10               |
| miR-199         | 2     | 1    | 0       | 1       | -0.10               |

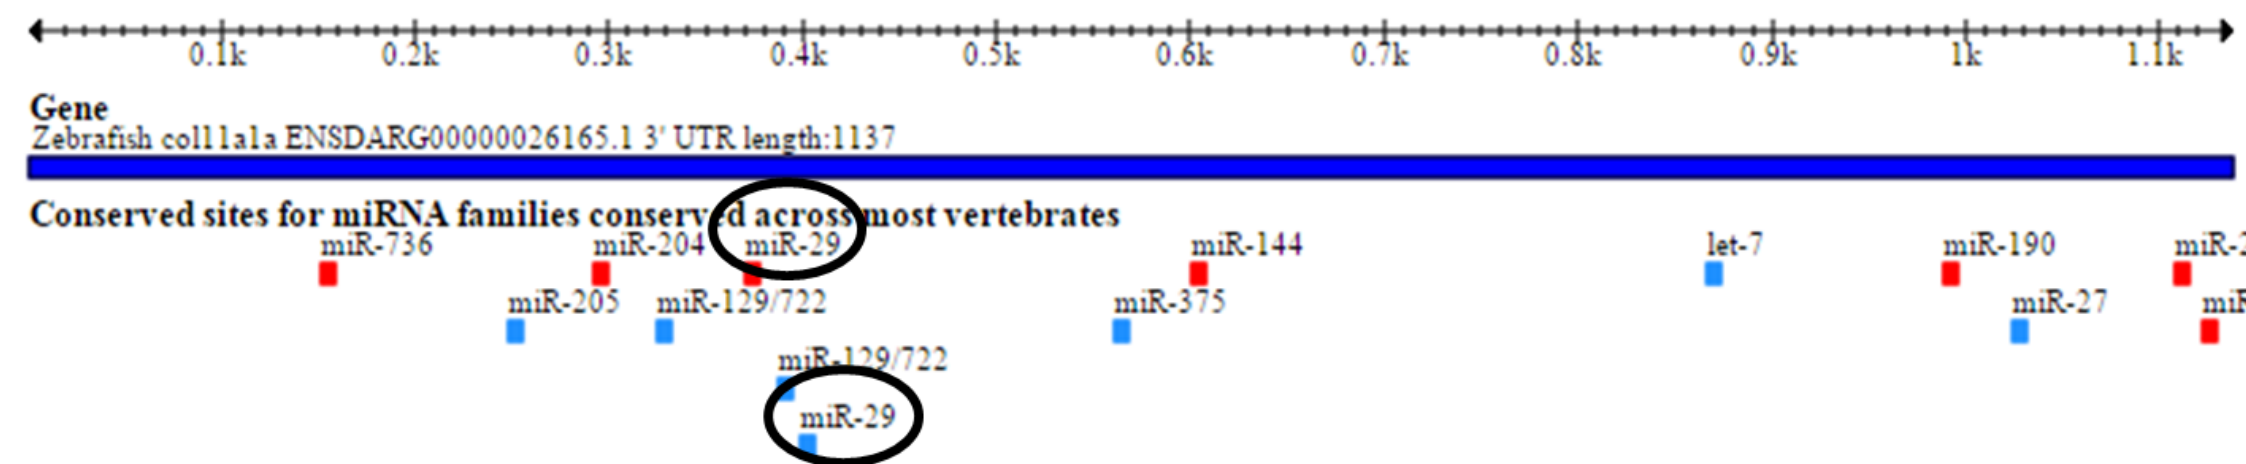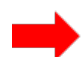

| miRNA   | Sites |      |         |         | Total Context score |
|---------|-------|------|---------|---------|---------------------|
|         | Total | 8mer | 7mer-m8 | 7mer-1A |                     |
| miR-29  | 2     | 0    | 1       | 1       | -0.42               |
| miR-145 | 1     | 0    | 1       | 0       | -0.27               |
| miR-190 | 1     | 0    | 1       | 0       | -0.21               |
| miR-203 | 1     | 0    | 1       | 0       | -0.18               |
| let-7   | 1     | 0    | 0       | 1       | -0.15               |
| miR-736 | 1     | 0    | 1       | 0       | -0.13               |
| miR-27  | 1     | 0    | 0       | 1       | -0.10               |
| miR-144 | 1     | 0    | 1       | 0       | -0.10               |
