# Supplementary material for: MicroRNA miR-29 controls a compensatory response to limit neuronal iron accumulation during adult life and aging
Source: PubMed Central journal article supplement (PMC5304403; doi:10.1186/s12915-017-0354-x), 2017-02-13
Supplement: 12915_2017_354_MOESM6_ESM.pdf [file 12915_2017_354_MOESM6_ESM.pdf]

**A**

DEGs UP SPONGE-29

TARGET SCAN LIST

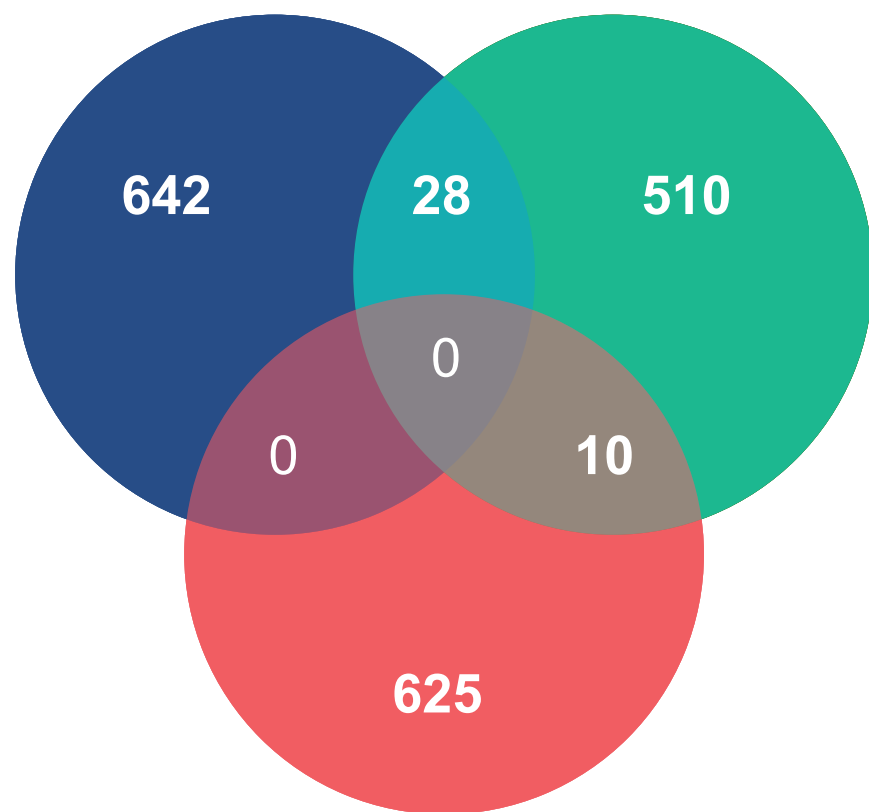

DEGs DOWN SPONGE-29

**C**Predicted mir-29 targets **down-regulated**

|              |  |  |  |  |   |
|--------------|--|--|--|--|---|
| TET3         |  |  |  |  | 3 |
| DNMT3AB      |  |  |  |  | 3 |
| DNMT3B       |  |  |  |  | 3 |
| MEX3B        |  |  |  |  | 3 |
| COL4A1       |  |  |  |  | 3 |
| NSD1A        |  |  |  |  | 3 |
| BACH2B       |  |  |  |  | 3 |
| XKR7(2 OF 2) |  |  |  |  |   |
| RCC2         |  |  |  |  | 3 |
| DIEXF        |  |  |  |  | 3 |

- Binding site conserved in *N. furzeri*
- Binding site conserved in *H. sapiens*
- Expression not influenced by aging

**B**Predicted mir-29 targets **up-regulated**

|                |  |  |  |  |   |
|----------------|--|--|--|--|---|
| KDM6BB         |  |  |  |  | 4 |
| DOT1L          |  |  |  |  | 4 |
| EPC1           |  |  |  |  |   |
| FRAS1          |  |  |  |  |   |
| GRIP1          |  |  |  |  | 4 |
| LAMC1          |  |  |  |  | 4 |
| PNPLA3         |  |  |  |  | 1 |
| PER2           |  |  |  |  |   |
| HBP1           |  |  |  |  | 1 |
| AHSG           |  |  |  |  |   |
| ANKRD50        |  |  |  |  |   |
| BGNB           |  |  |  |  |   |
| CU571169.4     |  |  |  |  |   |
| ACY1           |  |  |  |  | 4 |
| WU:FB52C12     |  |  |  |  |   |
| HMCN2          |  |  |  |  |   |
| CDKL1          |  |  |  |  | 1 |
| CU638738.1     |  |  |  |  |   |
| PHC2B          |  |  |  |  |   |
| HYAL4          |  |  |  |  | 1 |
| NEFL           |  |  |  |  | 4 |
| IGFBP2A        |  |  |  |  |   |
| TMEM38A        |  |  |  |  |   |
| TLX3B          |  |  |  |  |   |
| MARCH9         |  |  |  |  |   |
| FHOD3 (1 OF 2) |  |  |  |  |   |
| AEBP1 (2 OF 2) |  |  |  |  |   |

- Binding site conserved in *M. musculus*
- Interaction observed with CLIP-seq assay
- 1-3-4** Referred to gene dataset type of fig. 3E
