# Supplementary material for: MicroRNA miR-29 controls a compensatory response to limit neuronal iron accumulation during adult life and aging
Source: PubMed Central journal article supplement (PMC5304403; doi:10.1186/s12915-017-0354-x), 2017-02-13

A

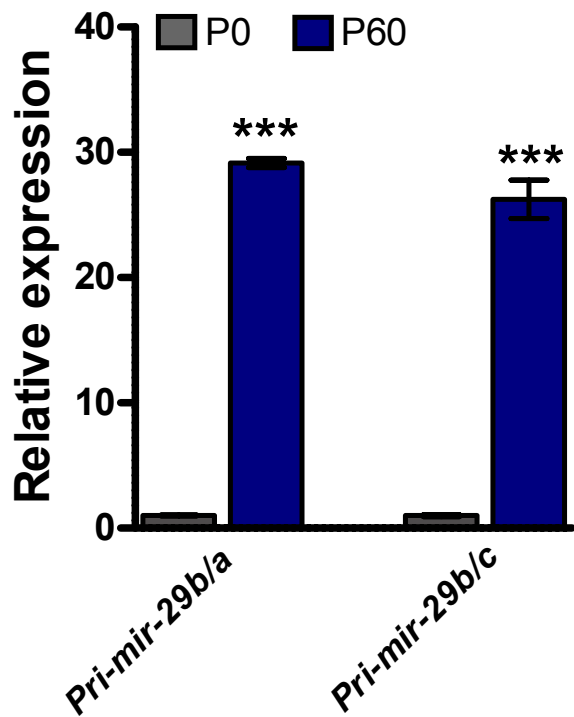

B

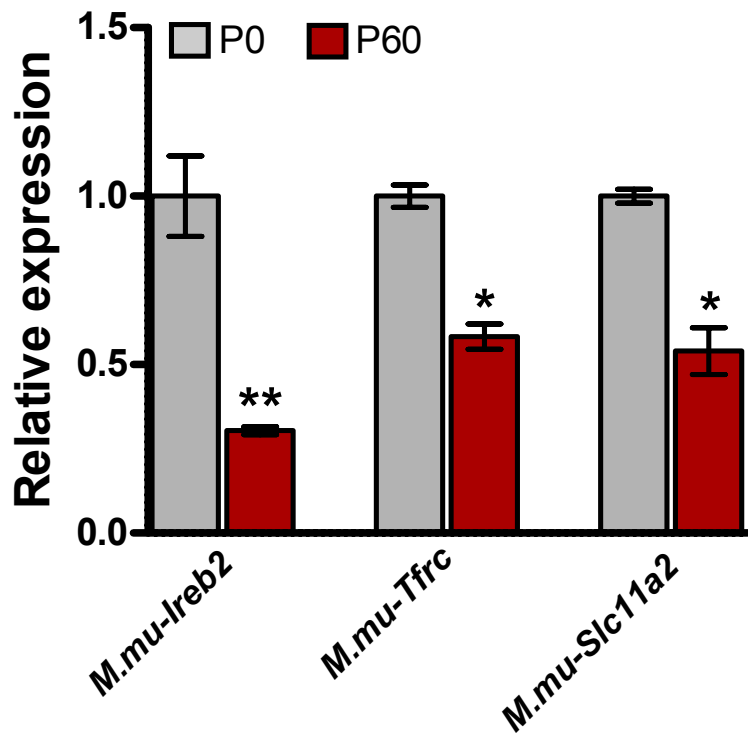

Supplement: 12915_2017_354_MOESM9_ESM.pdf [file 12915_2017_354_MOESM9_ESM.pdf]
